1 **Title:** Timing dependent synergies between motor cortex and posterior spinal stimulation in humans

2 **Abbreviated title:** Paired motor cortex and spinal cord stimulation

3 James R. McIntosh<sup>a, b, d</sup>, Evan F. Joiner<sup>c,\*</sup>, Jacob L. Goldberg<sup>d,\*</sup>, Phoebe Greenwald<sup>c</sup>, Lynda M. Murray<sup>h, i</sup>, Earl Thuet<sup>f</sup>,  
4 Oleg Modik<sup>c</sup>, Evgeny Shelkov<sup>c</sup>, Joseph M. Lombardi<sup>a, f</sup>, Zeeshan M. Sardar<sup>a, f</sup>, Ronald A. Lehman<sup>a, f</sup>, Andrew K. Chan<sup>c, f</sup>,  
5 K. Daniel Riew<sup>a, d, f</sup>, Noam Y. Harel<sup>g, h, i</sup>, Michael S. Virk<sup>d</sup>, Christopher Mandigo<sup>c, f</sup>, Jason B. Carmel<sup>a, b, d</sup>

6 <sup>a</sup>Dept. of Neurology, <sup>b</sup>Dept. of Orthopedic Surgery, <sup>c</sup>Dept. of Neurological Surgery, Columbia University, 650 W.  
7 168th St, New York, NY, 10032, USA

8 <sup>d</sup>Dept. of Neurological Surgery, <sup>e</sup>Dept. of Neurology, Weill Cornell Medicine - New York Presbyterian, Och Spine,  
9 1300 York Ave, New York, NY 10065

10 <sup>f</sup>New York Presbyterian, The Och Spine Hospital, 5141 Broadway, New York, NY 10034

11 <sup>g</sup>Departments of Neurology, <sup>h</sup>Rehabilitation and Human Performance, Icahn School of Medicine at Mount Sinai, One  
12 Gustave L. Levy Place, New York, NY 10029

13 <sup>i</sup>James J. Peters VA Med. Ctr., 130 West Kingsbridge Road, Bronx, NY 10468

14 \*These authors contributed equally.

15 Correspondence should be addressed to J. B. Carmel ([jason.carmel@columbia.edu](mailto:jason.carmel@columbia.edu)) or J. R. McIntosh  
16 ([j.mcintosh@columbia.edu](mailto:j.mcintosh@columbia.edu))

17 **Keywords:** Epidural; Electrical stimulation; Cervical; Motor cortex; Spinal cord; Myelopathy; Motor evoked potentials.

18 **Abbreviations:** ADM, abductor digiti minimi; AH, Abductor Hallucis; APB, abductor pollicis brevis; AUC, Area Under  
19 the Curve; DREZ, dorsal root entry zone; ECR, extensor carpi radialis; EDB, Extensor Digitorum Brevis; SCS, spinal  
20 cord stimulation; FCR, flexor carpi radialis; mJOA, Modified Japanese Orthopaedic Association; MEP, Motor Evoked  
21 Potential; SEM, Standard Error of the Mean; TA, Tibialis Anterior; tES, transcranial electrical stimulation.

## 22 **Key points summary**

- 23 ● Pairs of stimuli designed to alter nervous system function typically target the motor system alone or the  
24 sensorimotor convergence in cortex.
- 25 ● In humans undergoing clinically indicated surgery we tested a paired brain and spinal cord stimulation paradigm  
26 that we developed in rats to target sensorimotor convergence in the cervical spinal cord.
- 27 ● Arm and hand muscle responses to paired sensorimotor stimulation were six times larger than brain or spinal  
28 cord stimulation alone when applied to the posterior but not anterior spinal cord.
- 29 ● Arm and hand muscle responses to paired stimulation were more selective for targeted muscles than the brain-  
30 or spinal-only conditions, especially at latencies that produced the strongest effects of paired stimulation.
- 31 ● The paired stimulation effect was independent of the degree of myelopathy, suggesting that it could be applied  
32 as therapy in people affected by disorders of the central nervous system.

33

34 **Abstract**

35 Volitional movement requires descending input from motor cortex and sensory feedback through the spinal cord. We  
36 previously developed a paired brain and spinal electrical stimulation approach in rats that relies on convergence of the  
37 descending motor and spinal sensory stimuli in the cervical cord. This approach strengthened sensorimotor circuits and  
38 improved volitional movement through associative plasticity. In humans it is not known whether dorsal epidural SCS  
39 targeted at the sensorimotor interface or anterior epidural SCS targeted within the motor system is effective at facilitating  
40 brain evoked responses. In 59 individuals undergoing elective cervical spine decompression surgery, the motor cortex  
41 was stimulated with scalp electrodes and the spinal cord with epidural electrodes while muscle responses were recorded  
42 in arm and leg muscles. Spinal electrodes were placed either posteriorly or anteriorly, and the interval between cortex  
43 and spinal cord stimulation was varied. Pairing stimulation between the motor cortex and spinal sensory (posterior) but  
44 not spinal motor (anterior) stimulation produced motor evoked potentials that were over five times larger than brain  
45 stimulation alone. This strong augmentation occurred only when descending motor and spinal afferent stimuli were  
46 timed to converge in the spinal cord. Paired stimulation also increased the selectivity of muscle responses relative to  
47 unpaired brain or spinal cord stimulation. Finally, paired stimulation effects were present regardless of the severity of  
48 myelopathy as measured by clinical signs or spinal cord imaging. The large effect size of this paired stimulation makes  
49 it a promising candidate for therapeutic neuromodulation.

50

51

## 52 **1 Introduction**

53 Learning and execution of skilled movements, such as reaching and grasping, require coincident activity of motor and  
54 sensory circuits. Identifying how sensory and motor connections integrate has been an important goal for understanding  
55 movement (Wolpert, Diedrichsen, and Flanagan 2011). One tractable way to test and modify sensorimotor circuits has  
56 been to deliver pairs of exogenous stimuli (Asan, McIntosh, and Carmel 2022), one to the sensory and the other to the  
57 motor system. For example, paired associative stimulation (Stefan et al. 2000) combines motor cortex stimulation and  
58 sensory nerve stimulation at the wrist. Paired stimulation techniques provide the opportunity to probe nervous system  
59 interactions and to change connections through activity-dependent plasticity.

60 It is not known which sites of sensorimotor integration might be best to target with paired stimulation to strengthen  
61 circuits in health or disease. Paired associative stimulation targets the brain and can modulate muscle responses from  
62 motor cortex stimulation up or down depending on timing. Similarly, we hypothesised that timing motor cortex and  
63 spinal sensory stimulation to converge in the spinal cord would target another key site of sensorimotor integration. To  
64 test this, we have used epidural electrodes to pair motor cortex stimulation with dorsal (sensory) *spinal cord* stimulation  
65 in rats. Epidural spinal cord stimulation recruits a large number of sensory axons as they enter the spinal cord  
66 (Capogrosso et al. 2013; Liang et al. 2023; McIntosh et al. 2023). In one preclinical study, our group showed that timing  
67 motor cortex and dorsal epidural spinal stimulation to converge in the spinal cord markedly increased the motor evoked  
68 potential (MEP) (by 155%), while convergence in motor cortex resulted in a much smaller effect (17%) (Pal et al. 2022).  
69 We have shown this method of paired stimulation targeted at sensorimotor interactions in the spinal cord to induce  
70 plasticity (Mishra et al. 2017) and improve dexterity in rats with spinal cord injury (Pal et al. 2022).

71 Our sensorimotor approach contrasts with other successful paired stimulation approaches that target only the motor  
72 system. Foundational experiments paired stimuli within the motor cortex (Jackson, Mavoori, and Fetz 2006; Seeman et  
73 al. 2017) to induce plasticity. More analogous to our approach, paired stimulation has been used to target interactions  
74 between the corticospinal tract and motoneurons in the spinal cord. One approach used repetitive intraparenchymal  
75 motor cortex and spinal cord stimulation in non-human primates (Nishimura et al. 2013) to induce plasticity. In humans,  
76 corticospinal stimulation can be delivered non-invasively with transcranial magnetic stimulation while non-invasive  
77 peripheral nerve stimulation is used to activate motoneurons antidromically (Taylor and Martin 2009; Bunday and Perez

78 2012). These techniques have been demonstrated to induce plasticity in the motor system and to improve movement in  
79 people with spinal cord injury (Bunday, Urbin, and Perez 2018).

80 Other paired stimulation approaches have shown effects of convergent stimuli, but which circuits were activated was  
81 less clear. In humans, pairing brain stimulation with non-invasive spinal cord stimulation techniques (Roy, Bosgra, and  
82 Stein 2014; Knikou 2014; Al'joboori et al. 2021) and mixed motor and sensory peripheral nerve stimulation (Cowan et  
83 al. 1986; Deuschl et al. 1991; Poon et al. 2008; Guzmán-López et al. 2012), have been investigated. The ability to use  
84 more targeted epidural anterior or posterior spinal cord stimulation (Guiho, Baker, and Jackson 2021) in humans paves  
85 the way to test whether such targeting, either motor-motor or sensorimotor respectively, effectively facilitates motor  
86 responses to brain stimulation in humans.

87 Moreover, paired stimulation may enable greater selectivity of muscles that are commonly targeted by stimulation at  
88 either of the two sites. Electrical stimulation of the motor cortex can produce widespread activation across multiple  
89 muscles (Szelényi, Kothbauer, and Deletis 2007). Our previous work (McIntosh et al. 2023) showed that epidural spinal  
90 cord stimulation (SCS) produces the largest MEPs from muscles innervated by the stimulated spinal segment with spread  
91 to adjacent myotomes. Combined brain and spinal cord stimulation may allow an increase of selectivity for the muscles  
92 activated in common by both methods. Increased selectivity may allow equivalent strength of activation using lower  
93 stimulation intensity, thereby enhancing safety and tolerability.

94 We hypothesised that motor cortex and epidural cervical spinal cord stimulation would create strong and selective  
95 muscle responses when descending motor and spinal sensory stimuli converge in the cervical cord. We tested this  
96 hypothesis in the operating room in people undergoing clinically indicated elective spine surgery. We took advantage of  
97 the fact that spinal decompression surgery to relieve stenosis is done either via an anterior or a posterior approach. This  
98 enabled us to pair motor cortex stimulation with either spinal motor (anterior) or sensory (posterior) stimulation. This  
99 allowed us to extend our findings in rats to test the proper site of paired stimulation and whether pairing changes the  
100 strength or selectivity of arm and hand muscle activation.

101

## 102 **2 Material and methods**

### 103 *2.1 Experimental design*

104 We conducted a single session physiology study in people during clinically indicated surgery for cervical stenosis to  
105 address this hypothesis. Participants were identified prospectively by study personnel when they were scheduled for  
106 elective surgery with the goal of spinal cord decompression via either an anterior or posterior approach. Anterior surgery  
107 included removal of the intervertebral disc or the vertebral body, while posterior surgery included laminectomy. Both  
108 approaches provided access to the epidural space. To make stimulation as specific as possible we positioned the  
109 electrodes at the medio-lateral location where roots either enter (dorsal) or exit (anterior) the spinal cord. The primary  
110 outcome of the study was change in the MEP size recorded from arm muscles during paired stimulation compared to  
111 brain or spinal cord stimulation alone. To test the proper timing of stimulation, the inter-stimulus interval (ISI) between  
112 motor cortex and spinal stimulation was varied. To determine the differential effects of sensory versus motor spinal cord  
113 stimulation, suprathreshold motor cortex stimulation was combined with either dorsal (sensory) or anterior (motor)  
114 spinal cord stimulation performed below motor threshold (Supporting Information Table 1). To quantify whether pairing  
115 produces synergistic effects, suprathreshold brain stimulation and suprathreshold spinal stimulation were compared to  
116 each site alone. To further examine the role of timing, we paired single-pulse and subthreshold motor cortex stimulation  
117 with suprathreshold spinal stimulation. In order to determine the selectivity of paired stimulation for the targeted muscle,  
118 optimal pairing was compared to suprathreshold brain-only and suprathreshold spinal-only stimulation. Finally, to  
119 determine whether spinal cord and nerve root compression alter the effects of paired stimulation, the MEPs of paired  
120 stimulation were compared in segments with and without compression and also analysed in relation to clinical signs of  
121 neural injury.

### 122 *2.2 Participants*

123 The study enrolled adult patients who required surgical treatment for cervical spondylotic myelopathy or foraminal  
124 stenosis. Patients were recruited from the clinical practices of spine surgeons at the Ochsner Spine Hospital and Weill-  
125 Cornell NewYork-Presbyterian. The study protocol was conducted in compliance with the Declaration of Helsinki after  
126 it was reviewed and approved by the Institutional Review Boards of Columbia University Irving Medical Center and

127 Weill Cornell Medicine (ClinicalTrials.gov: NCT05163639). We limited the extension of surgery for the purpose of  
128 experimentation to no longer than 15 minutes to minimise the risk of increased surgical and anaesthetic complications  
129 (Brendler 1968).

130 Enrollment criteria: Participants were recruited if their clinically indicated surgery provided access to the cervical  
131 epidural space. Participants were excluded if they had neck or chest stimulation devices (e.g., vagal nerve stimulation,  
132 cardiac pacemaker), epilepsy, a history of skull surgery with metal implants, cochlear implants, aneurysm clips or stents  
133 in neck or cerebral blood vessels, or evidence of skull shrapnel. Before surgery, written informed consent was obtained  
134 from all participants. Standard of care preoperative clinical assessments were conducted, including clinical MRI scans  
135 to assess the degree of foraminal stenosis and the extent and location of T2 signal hyperintensity within the spinal cord.  
136 Foraminal stenosis was defined as severe when no fat could be observed around the nerve root within the foramen. The  
137 severity of myelopathy in terms of motor and sensory dysfunction in the upper and lower extremities, as well as urinary  
138 dysfunction, was assessed using the Modified Japanese Orthopaedic Association (mJOA) scale (Benzel et al. 1991).  
139 Mild myelopathy is defined as mJOA scores from 15 to 17, moderate myelopathy with mJOA from 12 to 14, and severe  
140 myelopathy is mJOA scores from 0 to 11.

141 We powered the study based on the first 5 participants taking part in the main stimulation paradigm: suprathreshold  
142 motor cortex stimulation paired with subthreshold posterior spinal cord stimulation. To achieve >80% power on the  
143 comparison of whether facilitation was greater than 0%, 12 participants would be needed. Additional participants were  
144 subsequently recruited to investigate other conditions and enable correction for multiple comparisons in the ISI range 3-  
145 13 ms.

### 146 *2.3 Electrical stimulation and recording*

147 Following anaesthesia induction and during recording, only total intravenous anaesthesia without paralytics was used.  
148 The Cadwell IOMAX (Cadwell Inc., WA, USA) intraoperative monitoring system was used for recording and  
149 stimulation. Muscles were chosen for intramuscular electromyogram (EMG) per standard of care, with additional  
150 recordings from wrist muscles (Fig. 1A). Due to clinical monitoring and hardware constraints, not all muscles were  
151 recorded in each experiment. On average, 16.1 muscles were recorded per participant. Biceps, triceps, APB, ADM, TA

152 and AH were consistently recorded ipsilateral to the site of spinal cord stimulation (> 98% of participants). Wrist muscles  
153 (ECR and FCR) were recorded in 69.5% of participants. The deltoid was typically recorded (93.2%) instead of trapezius  
154 (6.8%). MEP responses were recorded with needles placed in the muscles (Rhythmlink, SC, USA or Ambu, Denmark)  
155 at a sampling rate of 8.3 kHz and band-pass filtered between 10 Hz and 2 kHz.

156 Motor cortex stimulation was performed with transcranial electrical stimulation (tES). A monophasic triplet pulse with  
157 a width of 75 $\mu$ s and an ISI of 3ms was delivered through subdermal needle electrodes (Rhythmlink, SC, USA or AMC,  
158 FL, USA) placed in a quadripolar montage at C1, C2, C3, and C4 (see Fig. 1A inset). The two subdermal electrodes in  
159 the hemisphere targeted for stimulation served as the anode, and the two electrodes on the opposite hemisphere served  
160 as the cathode. The quadripolar configuration resulted in lower thresholds than bipolar stimulation in pilot experiments  
161 (data not shown). Triple-pulse stimulation can reduce MEP threshold, which is important for experiments during ongoing  
162 surgery, but the timing of descending activation is ambiguous. Hence, we employed single-pulse tES in a subset of  
163 experiments to determine precise timing of brain-spinal cord interactions. For experiments in 11 participants we  
164 observed reliable MEPs at 50V, the lowest stimulation intensity allowed by the intraoperative hardware. In these  
165 instances, in order to measure the MEP threshold we reduced the pulse width to 50 $\mu$ s for the duration of the experiment.

166 The experimental procedure began once the dura was exposed and the epidural stimulation electrode was positioned.  
167 For spinal cord stimulation (SCS), a single biphasic pulse (pulse-width = 250  $\mu$ s) using a flexible catheter electrode with  
168 1.3-mm contacts and 15-mm spacing (Ad-Tech Medical Instrument Corp, WI, USA) was used. Epidural electrodes were  
169 oriented in the rostro-caudal direction (Fig. 1B-C), with the cathode caudal and straddling the dorsal root entry zone  
170 (DREZ) or ventral root exit. The electrodes were positioned on the less affected side as determined by the muscle strength  
171 grading. If the strength grading was the same on both sides, the side with a lower threshold cortical-evoked MEPs was  
172 targeted. If the selected side was surgically inaccessible, the experiment was carried out on the accessible side. The  
173 location of the exiting or entering cervical nerve was estimated based on bony and neural anatomical landmarks. This  
174 method of hand placement of the electrode was previously validated by co-registering intraoperative computer  
175 tomography with pre-operative MRI and verifying the electrode placement relative to the DREZ (McIntosh et al. 2023).  
176 In a subset of cases (n = 23), intraoperative imaging was required as part of the surgical procedure and this was  
177 subsequently utilised to confirm the location of the electrode contacts (e.g., Fig. 1C).



178 *2.3.1 Determination of MEP Threshold and Choice of Target Muscle*

179 Upon insertion of the cervical epidural spinal cord electrode, we determined the threshold for spinal-evoked MEPs by  
180 increasing the stimulation intensity in 0.5 mA steps. Next, we conducted an equivalent procedure for tES by  
181 incrementing the voltage in steps of 5 V and observing the threshold for cortical MEPs in multiple ipsilateral muscles.  
182 All trains of brain and spinal stimulation stimuli were delivered at a rate of 0.5 Hz. For both spinal- and brain-evoked  
183 MEPs, we defined threshold as the lowest intensity at which a response was present in at least 50% of trials. Spinal  
184 stimulation was confirmed to be subthreshold by recording five MEPs.

185 Candidate target muscles were those where both brain- and spinal-evoked MEPs could be observed at stimulation  
186 intensities that did not interfere with ongoing surgery, irrespective of which cervical segment was stimulated. We  
187 prioritised hand muscles, starting with the abductor pollicis brevis (APB), followed by the wrist, upper arm, and  
188 shoulder. Ultimately, we selected a single muscle as the target and re-determined thresholds to a resolution of 0.1 mA  
189 for spinal stimulation intensity and 1 V for tES intensity.

190 *2.3.2 Comparison of Facilitation of Cortical MEPs by Posterior vs Anterior Spinal Stimulation*

191 To determine whether posterior or anterior spinal stimulation augments cortical MEPs, equivalent experiments were  
192 performed with epidural electrodes placed either in the posterior or anterior epidural space. Posterior spinal stimulation  
193 was targeted to the DREZ, and the ventral stimulation was targeted to the root exit zone of the segment exposed during  
194 the surgery. In a single participant, both anterior and posterior positioning was performed within the same surgery. Paired  
195 stimulation performed with triple-pulse tES was delivered at 110% of the MEP threshold, and subthreshold spinal  
196 stimulation at 90% of the MEP threshold. The ISI between the initiation of tES and subsequent SCS was varied between  
197 3 and 13 ms. Each pairing event was repeated five times, with the MEPs sequentially averaged and saved for subsequent  
198 analysis. In a subset of experiments, pairing events were repeated ten times.

199 To quantify the size of the paired brain and spinal stimulation effect, the MEP size at each ISI was divided by the brain-  
200 only stimulation MEP. We defined the optimal ISI as the ISI at which the largest MEP was generated.

201

### 2.3.3 *Estimation of Synergy in Corticospinal Convergence*

When applying tES and SCS each at 110% of MEP threshold, a simple additive model would predict that the resultant MEP is the sum of the brain-only and spinal-only MEPs. On the other hand, a synergistic model of the interaction of brain and spine stimulation would predict a resultant MEP that is greater than the sum of its parts. In order to determine whether the convergence of brain and spinal stimulation was additive or synergistic, we performed triple-pulse suprathreshold tES (110%) combined with suprathreshold SCS (110%), targeting either the DREZ or the ventral root exit zone.

Lastly, to investigate the effect of tES intensity on facilitation, we applied suprathreshold SCS in conjunction with subthreshold tES, where the intensity of tES was varied between 50V and its previously determined maximum.

### 2.3.4 *Estimation of the Precise Inter-stimulus Interval*

To accurately determine the ISI required for SCS to produce convergence relative to tES, we employed single-pulse tES. In most cases, the cortical MEP threshold was above the maximum tested voltage (typically 300 V) or at intensities that would disrupt the ongoing surgical procedure. As a result, we used the maximum possible voltage that would neither interfere with surgery nor exceed 300 V. In cases where the threshold was observable, we maintained consistency with the subthreshold tES approach by setting the stimulation intensity to 90% of threshold. For the pairing condition, we combined subthreshold tES with suprathreshold SCS set at 110% to establish a baseline. Pairing was conducted with ISIs ranging from 0 ms to 5 ms.

### 2.3.5 *Epidural spinal cord recording*

In order to directly determine the timing of corticospinal transmission in a single participant, tES was ramped from 50V to 300V while the catheter electrode was switched to ports for recording of electrophysiological potentials. The recorded potentials were bandpass filtered between 0.3 kHz and 10 kHz.

## 2.4 *Data analysis*

The intraoperative monitoring software's data was exported to MATLAB (R2022a, MathWorks, Inc., MA, USA). MEPs were zero-phase filtered using a Butterworth design, with a fifth-order lowpass filter at a 500 Hz passband and a sixth-

226 order bandstop filter with a 59–61 Hz stopband. The AUC was calculated over a window from 8.5 ms to 75 ms after the  
227 first stimulation pulse began in order to capture the range of brain and spinal MEP across multiple muscles. Study data  
228 were collected and managed using REDCap (Research Electronic Data Capture) electronic data capture tools hosted at  
229 Weill Cornell Medical Center and Columbia University Irving Medical Center (Harris et al. 2009; 2019).

#### 230 *2.4.1 Statistical analysis*

231 Values are reported as mean  $\pm$  standard error of the mean (SE) except when the median is employed. Nonparametric  
232 statistical tests are used throughout (Wilcoxon rank-sum, signed-rank tests and Kruskal–Wallis tests,  $\alpha = .05$ ), and  
233 Bonferroni correction was applied unless otherwise noted.

#### 234 *2.4.2 Artefact rejection*

235 We employed the same method for rejecting MEPs as previously described (McIntosh et al. 2023). Briefly, rejection  
236 was based on principal component analysis and human observer confirmation. The process involved computing principal  
237 components for a specific muscle across multiple stimulation intensities, regressing them with each MEP, and ranking  
238 the responses based on the root mean square of the regression error. While blinded to the stimulation condition, a  
239 manually adjusted sliding scale was then applied to reject traces that did not appear physiological under visual inspection:  
240 deflections in baseline, spread of stimulation artefact into the evoked response, excessive line noise, and fluctuations  
241 that were not time-locked to other responses. These were typically related to electrocautery or drilling and appeared  
242 stereotypical; they were randomly distributed across different phases of the experiment. This led to 52,048 analysed  
243 MEPs of which 11,337 (21.8%) were rejected. When considering the targeted muscles of the arm and hand, 30,188  
244 MEPs were analysed of which 2,949 (9.8%) were rejected. Note that this is higher than in our previous work with SCS  
245 (McIntosh et al. 2023) due to the tES induced artefact being more extensive and the presence of additional sources of  
246 artefact induced by the ongoing surgery. Rejection was performed blinded to the ISI.

247

### 2.4.3 Calculation of pairing effect

To assess facilitation, we normalised the AUC at each tested pairing ISI using the following approach:

1. Suprathreshold tES paired with subthreshold SCS was divided by the suprathreshold brain-only stimulation after confirming the absence of spinal MEPs.
2. Subthreshold tES paired with suprathreshold SCS was divided by suprathreshold spinal-only stimulation after confirming the absence of tES MEPs.
3. Suprathreshold tES paired with suprathreshold SCS was divided by the sum of the suprathreshold spinal-only and suprathreshold brain-only stimulation (minus background activity (Guiho et al., 2021)).

### 2.4.4 Across participant averaging

Normalised AUCs were converted to percentage facilitation and illustrated as bar charts. A facilitation of 0% indicates that pairing produces no change relative to baseline, and 100% indicates a doubling of the MEP size. To generate the across-participant average, AUCs were averaged among all participants that had experiments with a given condition. In cases where ISIs within our test range (3-13 ms) were missing due to experimental error, surgical procedure constraints, or presence of artefact, we applied linear interpolation (14% of data) at the individual participant level before calculating the average. Analyses without interpolating data did not change the major findings.

### 2.4.5 Calculation of selectivity

To examine whether the combination of brain and spinal cord stimulation can isolate individual muscles more effectively than either brain-only or spinal-only stimulation, we conducted a comparison of selectivity across these conditions. The pairing MEPs used for this analysis were extracted from suprathreshold tES (110%) and subthreshold SCS (90%) conditions at the optimal ISI. For the brain-only condition, suprathreshold stimulation (110%) was used. We included only those cases in which suprathreshold (110%) spinal-only stimulation intensity was also tested, as this was used to estimate spinal-only selectivity values. This analysis uses all muscles recorded ipsilateral to spinal cord stimulation; however, because the intensity can only be set for a single targeted muscle, non-targeted muscles may be above or below threshold.

272 The selectivity for a particular muscle was calculated as its AUC divided by the sum of the AUCs of all other muscles  
273 recorded on the same side of the body (McIntosh et al. 2023). This calculation ensures that the sum of selectivities across  
274 all muscles equals one. The AUC of the target muscle was selected to compare the levels of selectivity in a given  
275 experiment. However, we also established a measure of selectivity that could be evaluated across muscles regardless of  
276 the target. For this across-muscle measure, we utilised the equation  $S = 1 + \frac{\sum_m^M x_m \times \log(x_m)}{\log(M)}$ , where  $x_m$  is the individual  
277 muscle selectivity for muscle  $m$ , and  $M$  is the number of muscles. This equation incorporates the same structure as the  
278 entropy equation which has been previously used as a measure of selectivity (Lehky, Sejnowski, and Desimone 2005)  
279 but is normalised so that it takes a value of 0 when individual muscle selectivities are equal in all muscles and a value  
280 of 1 when only one muscle is activated.

281 There is likely to be an interaction between the size of the pairing effect and the selectivity of muscle recruitment. To  
282 determine this interaction, selectivity for all muscles was computed for each ISI. To determine the effect of pairing, the  
283 selectivity during brain and spinal cord pairing was divided by the selectivity of the summed suprathreshold tES (110%)  
284 and subthreshold SCS (90%) conditions.

#### 285 *2.4.6 The impact of impairment on synergistic effects*

286 To determine if paired stimulation was affected by nervous system injury, the degree of facilitation was analysed in  
287 relation to clinical and radiographic evidence of compression. In this analysis, the maximum pairing effect was compared  
288 with 3 pre-operative clinical scores related to myelopathy (strength, reflex, and mJOA) and radiographic evidence of  
289 neural injury (T2 signal hyperintensity and foraminal stenosis). Medical Research Council strength scores (Compston  
290 2010) were averaged over the muscles of the forearm and hand on the stimulated side as these were the primarily targeted  
291 muscles. Reflex scores were derived from biceps and triceps on the targeted side as muscles of the forearm and hand  
292 were not typically tested. The maximum facilitation of suprathreshold brain and subthreshold spinal stimulation was  
293 used to summarise the strength of facilitation. Because of the strongly non-gaussian distribution of facilitation across  
294 participants, values were log transformed. Non-parametric Kruskal–Wallis one-way analysis of variance was used to  
295 assess the presence of a relationship between each of the dependent variables and the pairing facilitation strength. No  
296 correction for multiple comparisons was applied.

## 297 **3 Results**

### 298 *3.1 Participant recruitment and characteristics*

299 The study enrolled adult patients who required surgical treatment for cervical spondylotic myelopathy or multilevel  
300 foraminal stenosis (n = 63, 34M/29F, mean age 66 years, standard deviation = 11). In a subset of participants (n = 4),  
301 experimental procedures could not be attempted due to surgical constraints, and these participants have been excluded  
302 from further analysis. tES and SCS, at either the posterior (n = 46, 27M/19F), anterior (n = 12, 5M/7F) or both (n = 1,  
303 1F) aspects of the cervical enlargement were performed. We determined that participants undergoing stimulation of the  
304 posterior aspect of the spinal cord were not detectably different from those undergoing stimulation of the anterior aspect  
305 in their demographics or degree of impairment (Table 1 and Supporting Information Table 2).

### 306 *3.2 Posterior SCS augments motor cortex MEPs at the predicted convergence time, while anterior SCS does not*

307 We observed strong facilitation between appropriately timed transcranial electrical stimulation (tES) and posterior SCS  
308 targeting the dorsal root entry zones (DREZ). By calculating the difference between brain-only and spinal-only MEP  
309 onset times, we predicted that convergence would occur at  $9.8 \pm 0.6$ ms (Fig. 4). When suprathreshold tES was paired  
310 with subthreshold SCS (Fig. 1A-B), appropriate ISI for convergence in the spinal cord resulted in a significant  
311 facilitation of cortical MEPs in individual participants (Fig. 2). The degree of facilitation, when averaged across  
312 participants, was substantial, with an optimum ISI of 9 ms yielding an average increase of  $577 \pm 173\%$  ( $p = 3.2 \times 10^{-5}$ , n  
313 = 38, signed-rank test; Fig. 3A). Facilitation was strongly time-dependent ( $p = 0.001$ ,  $H(10) = 28.7$ , Kruskal–Wallis  
314 test), with the optimal ISI not different from the predicted convergence time (Fig. 4).

315 In contrast, when anterior spinal cord stimulation was paired with tES, there was no facilitation ( $23 \pm 21\%$  at an optimum  
316 ISI of 7 ms,  $p = 1.0$ , n = 12, signed-rank test; Fig. 3B). A direct comparison of the maximum facilitation of each  
317 participant between posterior (Supporting Information Fig. 1) and anterior (Supporting Information Fig. 2) stimulation  
318 demonstrated that posterior stimulation was more effective than anterior stimulation ( $p = 0.006$ ,  $n_{\text{posterior}} = 38$ ,  $n_{\text{anterior}} =$   
319 12, Wilcoxon Rank Sum test).

### 320 *3.3 Synergistic effects of brain and spinal stimulation*

321 To better understand the interactions of brain and spinal stimulation, we stimulated each site above motor threshold. We  
322 hypothesised there would be synergistic effects (i.e. the combined effects would be much larger than the MEPs of brain-  
323 or spinal-only stimulation). Using suprathreshold (110%) tES and posterior SCS, we altered the relative timing of  
324 stimulation.

325 A direct comparison of posterior and anterior stimulation demonstrated that suprathreshold posterior SCS was more  
326 effective than suprathreshold anterior SCS ( $p = 0.034$ ,  $n_{\text{posterior}} = 10$ ,  $n_{\text{anterior}} = 8$ , Wilcoxon Rank Sum test). The optimal  
327 ISI was 9 ms ( $n = 10$ ; Fig. 5A), similar to Fig. 3. The facilitation at this ISI was strongly synergistic (average =  $1166 \pm$   
328  $537\%$  relative to the sum of brain-only and spinal-only MEPs) but did not reach statistical significance ( $p = 0.16$ ,  $n =$   
329  $10$ , signed-rank test, lowest  $p = 0.02$  at 8ms not significant after correction for multiple comparisons). In contrast, with  
330 anterior SCS there was no facilitation, and the MEPs were simply additive (average =  $31 \pm 29\%$  at peak ISI of 11 ms,  $p$   
331 = 1.0,  $n = 8$ , signed-rank test; Fig. 5B).

### 332 *3.4 The timing of brain and spinal stimulation convergence*

333 To better understand the timed interactions between brain and spinal stimulation, we varied the time between a single  
334 pulse of tES and SCS (Fig. 6A). In the previous experiments, the interpretation of the timing of facilitation, as displayed  
335 in Fig. 3 and Fig. 5, was complicated by the application of three consecutive tES pulses over a span of 6ms, which was  
336 needed to reliably evoke a cortical MEP. Single pulse tES, as depicted in Fig. 6, does not typically generate an MEP at  
337 the voltages we employed (less than 300 V). However, given our previous observations of pronounced amplification in  
338 spinal circuits, we hypothesised that facilitation would still occur if suprathreshold SCS were introduced with an  
339 appropriate ISI relative to the subthreshold single pulse tES.

340 In an individual participant we evaluated ISIs at sub-millisecond precision to determine the onset and optimal ISI of  
341 facilitation (Fig. 6C-E). We also measured the recruitment curve of tES intensity at the optimal ISI to determine the  
342 dynamics of facilitation (Fig. 7). Additionally, epidural spinal cord recordings in response to tES were made to assess  
343 the transmission time from the brain to the spinal cord (Fig. 6E).

344 Facilitation began to be observed with spinal stimulation initiated between 1.0 ms and 1.3 ms after brain stimulation  
345 (Fig. 6A-C) and reached its maximum at an ISI of 2.5 ms (899%,  $p = 0.018$ ,  $n = 10$  repetitions, signed-rank test). Notably,

346 even without a detectable cortical MEP in the target muscle at voltages up to 300 V for this participant, facilitation  
347 initiated within the 50-75 V range (Fig. 7B, P56) and appeared to saturate at roughly 100 V when an ISI of 2ms was  
348 used.

349 Epidural spinal cord recordings of tES also referred to as D-waves (Vedran Deletis, Sala, and Ulkatan 2012) were made  
350 in the same participant as an indication of the corticospinal transmission time. The initial deflection is visible starting at  
351 2.8 ms after the initiation of stimulation at the intensity used for pairing brain and spine.

352 We confirmed that the facilitation was present in the 2-3 ms range by pairing single pulse tES and SCS in a further 10  
353 participants (Fig. 6E). Maximum facilitation was found to be  $690.5 \pm 338\%$  at 3.0 ms ( $p = 0.041$ ,  $n = 11$ , signed-rank  
354 test; Bonferroni corrected in the tested interval 0-5 ms). This optimal interstimulus interval is consistent with paired  
355 triple-pulse tES stimulation generating the largest MEP 3 ms after the last tES pulse (Fig. 3, Fig. 5). Further, this  
356 demonstrates that subthreshold brain stimulation can augment suprathreshold spinal stimulation.

### 357 *3.5 Synergy with tES far below motor threshold*

358 Facilitation of spinal MEPs was present even when combined with tES far below motor threshold. In five experiments  
359 we investigated the dependence of the paired facilitation to the stimulation intensity (Fig. 7A). At the optimal ISI using  
360 high intensity single-pulse tES (Fig. 7B), we stimulated the spinal cord at 110% of the MEP threshold while ramping up  
361 the single pulse tES intensity from 50V. Facilitation was initiated between 50 V and 100 V in all cases, which was  
362 considerably lower than the threshold for brain-only single-pulse stimulation in the majority of experiments (>250 V).

### 363 *3.6 Paired stimulation activated muscles more selectively*

364 Synergistic effects of stimulation were greatest in muscles targeted by brain and spinal stimulation in two representative  
365 cases (Fig. 8). In each, the tES was performed at 110% of threshold and SCS at 90% of threshold. In Fig. 8B, the spinal  
366 cord electrode was placed at C6, and tES intensities were optimised for the biceps muscle. While the strongest facilitation  
367 is presented in the biceps (1850%), it is also apparent in triceps (190%). In Fig. 8C, the spinal electrode was positioned  
368 at C8, and tES was optimised for the APB muscle. The strongest facilitation is present in the APB (138% increase).



369 We quantified this selectivity, first for individuals and then across participants (Fig. 9). Fig. 9A shows the muscle  
370 selectivity for a single participant. The measure of selectivity was calculated as the relative activation of a muscle under  
371 each of the conditions. For example a selectivity of 0.75 in the target flexor carpi radialis (FCR) indicates that the FCR  
372 contributes 75% of the total MEP AUC across muscles. This measure was repeated with brain only (110% of threshold),  
373 spinal only (110% of threshold), and paired stimulation at the optimal latency. In this participant, FCR was the most  
374 activated muscle in all conditions, but the selectivity measure of this muscle was larger for the paired condition than for  
375 the brain-only and spinal-only conditions.

376 The selectivity of muscle activation was compared across all participants. Selectivity in the targeted muscle was larger  
377 for paired than for brain-only stimulation (37.5%,  $p = 0.002$ ,  $n = 38$ , signed-rank test) but not for spinal-only stimulation  
378 (43.5%,  $p = 0.094$ ,  $n = 30$ , signed-rank test, Fig. 9B). To ensure that these effects were not due to the choice of muscles,  
379 the selectivity of activation was compared across muscles. In order to condense multiple muscle selectivities into a single  
380 value, we used the normalised metric of entropy that is small when MEP sizes are similar across muscles and large when  
381 a single muscle MEP dominates. Fig. 9C shows that when considering all muscles jointly, paired stimulation produces  
382 more selective muscle responses than either brain-only (22.6%,  $p = 0.014$ ,  $n = 38$ , signed-rank test) or spinal-only  
383 stimulation (31.0%,  $p = 0.003$ ,  $n = 30$ , signed-rank test).

384 We also determined whether selectivity has a dependence on ISI. A change in selectivity over the brain-only and spinal-  
385 only conditions in an individual participant is strongest at 7-8 ms in their targeted muscle (Fig. 10A). A maximum  
386 average across participant selectivity change in the target muscle of  $109.2 \pm 49.0\%$  ( $p = 0.013$ ,  $n = 38$ , signed-rank test;  
387 Fig. 10) is consistent with the optimal ISI of 9 ms. Similarly, the maximum across muscle measure of selectivity is  $33.9$   
388  $\pm 15.0\%$  at 9 ms ( $p = 0.022$ ,  $n = 38$ , signed-rank test; Fig. 10). The increase in selectivity change towards the optimal  
389 ISI is strongly related to a corresponding increase in facilitation (slope =  $4.74 \pm 0.81$ ,  $p = 2.4 \times 10^{-4}$ ,  $n = 11$ , Fig. 10).  
390 Thus, there is a strong correlation ( $R^2 = 0.79$ ) between how much a muscle is facilitated by pairing and how selective is  
391 the activation of the target muscle.

392 *3.7 Degree of impairment does not influence strength of facilitation*

393 In previous work we found that the facilitatory effects of combined brain and spinal stimulation were strong in both  
394 uninjured (Mishra et al. 2017) and spinal cord injured (Pal et al. 2022) rats. Consistent with this, there was no relationship  
395 between MEP augmentation and radiographic (T2 signal) or clinical evidence of myelopathy (mJOA, reflexes).  
396 Specifically, clinical measures of hand use (mJOA;  $p = 0.696$ ;  $n = 38$ , Kruskal–Wallis test, Fig. 11A), average strength  
397 of the forearm and hand (MRC scale;  $p = 0.375$ ;  $n = 35$ , Kruskal–Wallis test, Fig. 11B), a reflex score measured in the  
398 biceps muscle ( $p = 0.324$ ;  $n = 28$ , Kruskal–Wallis test, Fig. 11C), and a reflex score measured in the triceps muscle ( $p =$   
399  $0.410$ ,  $n = 27$ , Kruskal–Wallis test, Fig. 11D).

400 Additionally, no relationship was detectable between immediate effect size and the presence of T2-weighted signal  
401 change at the segment ( $p = 0.726$ ,  $n = 37$ , Wilcoxon rank-sum test; Fig. 11E) or above the segment ( $p = 0.742$ ,  $n = 37$ ,  
402 Wilcoxon rank-sum test; Fig. 11F). However, the presence of severe foraminal stenosis at the stimulated segment was  
403 associated with weaker facilitation ( $p = 0.042$ ,  $n = 22$ , Wilcoxon rank-sum test; Fig. 11G).

#### 404 **4 Discussion**

405 Our understanding of the interactions between descending motor systems and segmental afferents was advanced in four  
406 important ways. First, posterior but not anterior spinal cord stimulation augmented cortical MEPs, suggesting that  
407 synergistic effects of pairing involve descending motor and spinal sensory interactions. Second, the facilitation induced  
408 by spinal stimulation was maximal at the time that motor cortex stimuli arrived in the spinal cord, suggesting this location  
409 as the site of interaction. Third, pairing at the optimal inter-stimulus interval made muscle responses more selective, in  
410 addition to making them stronger. Fourth, the degree of facilitation was not detectably influenced by radiographic (T2  
411 signal) or clinical evidence of myelopathy (mJOA, reflexes).

412 We found a synergistic facilitation of MEPs when brain stimulation was combined with stimulation over the posterior–  
413 but not anterior–cervical spinal cord. This finding suggests that the interaction critical for the convergence mechanism  
414 that we observed takes place at the sensory-motor interface rather than solely within the motor system. This aligns with  
415 the understanding that anterior stimulation directly engages the motor unit (Guiho, Baker, and Jackson 2021). In contrast,  
416 the observed synergistic facilitation (greater than 5 fold) observed while pairing posterior spinal cord stimulation is  
417 consistent with facilitation in rats and monkeys (2-3 fold) that has been demonstrated to be mediated by afferents (Guiho,

418 Baker, and Jackson 2021; Pal et al. 2022), the primary neural target of SCS (Capogrosso et al. 2013; Greiner et al. 2021;  
419 Minassian et al. 2004). Prior research in rats has shown that repeated pairing of the posterior cervical spinal cord and  
420 motor cortex at the ISI that produces the largest facilitation (optimal ISI) also leads to lasting plasticity effects (Pal et al.  
421 2022). Nonetheless, the lack of facilitatory effects we observed from combined brain and anterior spinal cord stimulation  
422 does not necessarily preclude the induction of plasticity with repeated stimulation that directly engages the motor unit  
423 (Bunday and Perez 2012).

424 The timing of spinal stimulation relative to brain stimulation emerges as a critical factor in realising these synergistic  
425 effects. In all tested conditions, the latency of strongest facilitation was observed at 3 ms after the last stimulation pulse;  
426 when taken together with the estimate of corticospinal conduction time, this time interval suggests that the synergistic  
427 interaction is occurring in the cervical spinal cord. In a single participant, a central conduction time of 2.8 ms was  
428 estimated with an epidural spinal cord recording in response to brain stimulation (Di Lazzaro and Rothwell 2014). In  
429 this participant, the onset of facilitation was observed to be 1 - 1.3 ms. If this facilitation onset and the central conduction  
430 time were equal, it would imply that the spinal stimulation produced instant convergence, however the difference  
431 between these two values of 1.5 ms (Mills and Murray 1986; Taylor and Martin 2009) suggests the presence of a single  
432 synaptic delay.

433 The paired conditions are more selective than the brain- or spinal-only conditions. This increase in selectivity appears  
434 to be directly coupled to the inter-stimulus interval dependent increase in facilitation. It is currently unclear whether  
435 neuromodulation strategies are more effective when they are highly targeted to individual muscles (high selectivity) or  
436 when they are weakly targeted (low selectivity) producing broad activation of multiple muscles. Selective activation  
437 might benefit patient recovery without causing excessive muscle activation or off-target effects. When optimised, pairing  
438 brain and spinal stimulation may allow for more targeted plasticity in muscles that are clinically important to strengthen.

439 Synergistic effects of pairing brain and spinal stimulation were present regardless of the severity of myelopathy as  
440 measured by clinical signs or spinal cord imaging. This finding is consistent with our previous observation that pairing  
441 effects that were equally strong in uninjured rats and rats with spinal cord injury (Mishra et al. 2017; Pal et al. 2022),  
442 which spares <1% of the corticospinal tract (Yang et al. 2019). The presence of severe foraminal stenosis was associated  
443 with weaker pairing effects. Since the facilitation is mediated by the presence of afferent fibres, this observation is

444 consistent with H-reflex suppression observed in radiculopathy (Mazzocchio et al. 2001), potentially caused by axonal  
445 loss of afferents. We demonstrated that spinal stimulation can be a potent modulator of weak corticospinal activation,  
446 resonating with human studies where volitional control was regained despite severe damage to the neural pathway  
447 (Angeli et al. 2018; Carhart et al. 2004; Gill et al. 2018; Inanici et al. 2018; 2021; Powell et al. 2023; Rowald et al. 2022;  
448 Wagner et al. 2018). With regards to delivering paired brain and spinal stimulation as therapy, as has been applied in  
449 rats (Pal et al. 2022), it is also noteworthy that synergistic effects can be accessed at low intensities that may be tolerated  
450 by patients. In short, the independence of the synergistic effect from the degree of myelopathy suggests that repeated  
451 pairing could be viable as therapy for spinal cord injury.

452 Despite the large effect size on average, some participants did not display any synergistic effect. While the presence of  
453 severe foraminal stenosis at the stimulated segment may be associated with weaker facilitation, there may be other  
454 factors that contribute to this variability. As we have shown by comparing anterior and posterior stimulation, the position  
455 of the electrode is critical. For example, while large diameter afferents are the lowest threshold fibres in response to  
456 posterior cord stimulation (Greiner et al. 2021), it has been demonstrated that the corticospinal tract can be activated  
457 when it is specifically targeted (Vedran Deletis et al. 2018; V. Deletis and Bueno De Camargo 2001). Thus, deviations  
458 in the location of the electrodes may contribute to the activation of alternative tracts or fibres. Despite confirmation of  
459 electrode position via clinically indicated imaging in a subset of cases, the precise location of the electrode could not be  
460 directly visually inspected because it was placed under the lamina. Further study with intraoperative imaging and more  
461 targeted electrode configurations will be needed to understand the relationship between position and efficacy of  
462 stimulation.

463 The limitations of this study are largely related to the physiology being performed during a clinically indicated surgery.  
464 Experiments were performed under general anaesthesia, which can alter responses. However, while it is conceivable  
465 that general anaesthesia specifically affects the synergistic effect of paired stimulation, in rat studies synergistic effects  
466 were observed both in anaesthetised (Mishra et al. 2017) and awake animals (Pal et al. 2022). The surgery also limited  
467 the segments of the spinal cord that could be stimulated. The catheter electrode was placed at one segment below the  
468 most caudal laminectomy, and only one segment was tested in each surgery. Because of this, the most common segments  
469 tested were C7-T1, and the upper arm was targeted for pairing in less than 15% of experiments. Despite increased

470 selectivity with pairing, we observed some synergistic effects at muscles innervated at distant segments. Due to  
471 intraoperative constraints, we were unable to record full recruitment curves of the synergistic, brain-only and spinal-  
472 only conditions, or determine their saturation points.

473 This study paves the way to test the repeated application of combining brain and spinal stimulation in humans with the  
474 aim to invoke spinal cord associative plasticity mechanisms that have been previously observed in rats (Pal et al. 2022).  
475 The goal will be to convert the immediate changes in MEP size observed in this study into adaptive changes in the  
476 sensorimotor system that persist, taking advantage of the spinal cord's capacity for plasticity (Wolpaw 2010). We will  
477 also explore whether paired stimulation requires epidural electrodes or whether non-invasive methods could be used  
478 (Gad et al. 2018; Hofstoetter and Minassian 2022). This research deepens our understanding of spinal cord stimulation  
479 and may inform neurorehabilitation intervention based on associative stimulation of brain and spinal cord in humans.

## 480 **5 Additional Information**

### 481 *5.1 Competing interests*

482 *Jason B. Carmel* is a Founder and stock holder in BackStop Neural and a scientific advisor and stockholder in  
483 SharperSense. He has received honoraria from Pacira, Motric Bio, and Restorative Therapeutics. *Michael S. Virk* has  
484 been a consultant and has received honorarium from Depuy Synthes and BrainLab Inc; he is on the Medical Advisory  
485 Board and owns stock with OnPoint Surgical. *K. Daniel Riew*: Consulting: Happe Spine (Nonfinancial), Nuvasive;  
486 Royalties: Biomet, Nuvasive; Speaking and/or Teaching Arrangements: Nuvasive (Travel Expense Reimbursement);  
487 Stock Ownership: Amedica, Axionmed, Benvenue, Expanding Orthopedics, Happe Spine, Paradigm Spine, Spinal  
488 Kinetics, Spineology, Vertiflex. *Ronald A. Lehman*: Consulting: Medtronic; Royalties: Medtronic, Stryker. *Zeeshan M.*  
489 *Sardar*: Consulting: Medtronic; Grant/Research support from the Department of Defense. *Joseph M. Lombardi*:  
490 Consulting: Medtronic, Stryker. The other authors have nothing to disclose.

### 491 *5.2 Funding*

492 Sources of financial support: This study was funded by the National Institutes of Health (1R01NS124224); and the  
493 Travis Roy Foundation Boston, MA (Investigator Initiated).

494 *5.3 Acknowledgements*

495 We thank neurologists A. Mendiratta, P. Kent, H. Choi, M. Bell (The Ochsner Medical Center At New York Presbyterian  
496 Hospital), S. C. Karceski (Weill Cornell Medicine) and intraoperative monitoring technologists N. Patel, Z. Moheet  
497 (Weill Cornell Medicine), Joe Elliott, Brian Demboski, Kelley Wichman, Susannah Storms, Meghan Mullaney, Evance  
498 Desriviere (The Ochsner Medical Center At New York Presbyterian Hospital) for monitoring patient safety during the  
499 experiments, as well as help with running the experiments. We also thank M. Vulapalli, C. Mykolajchuk, J. Berger,  
500 (Weill Cornell Medicine), J. Reyes and P. Martinez (The Ochsner Medical Center At New York Presbyterian Hospital) for  
501 help with patient recruitment and administrative matters.

502 *5.4 Author contributions*

503 Conceptualization: JRM, NYH, MSV, JBC; Data Curation: JRM, PG; Formal Analysis: JRM, JBC; Funding  
504 Acquisition: JRM, NYH, MSV, JBC; Investigation: JRM, EFJ, JLG, PG, JML, ZMS, RAL, AKC, KDR, MSV, CM,  
505 JBC; Methodology: JRM, ET, OM, ES, NYH, MSV, CM, JBC; Project Administration: JRM, MSV, JBC; Resources:  
506 ET, OM, ES, ZMS, RAL, AKC, KDR, NYH, MSV, CM, JBC; Software: JRM; Supervision: ET, ES, MSV, JBC;  
507 Validation: JRM, LM, NYH, MSV, JBC; Visualisation: JRM, LM, NYH, JBC; Writing – Original Draft: JRM, JBC;  
508 Writing – Review & Editing: JRM, EFJ, JLG, PG, LM, ET, OM, ES, JML, ZMS, RAL, AKC, KDR, NYH, MSV, CM,  
509 JBC.

510 *5.5 Data availability statement*

511 The data that support the findings of this study are available from the corresponding authors, upon reasonable request.

512 **6 Supporting Information**

513 *Supporting Table 1* - Tested experimental conditions.

514 *Supporting Table 2* - Detailed clinical characteristics of participants.

515 *Supporting Figure 1* - Convergence of posterior subthreshold spinal stimulation and suprathreshold brain stimulation  
516 in individual participants.

517 *Supporting Figure 2* - Convergence of anterior subthreshold spinal stimulation and suprathreshold brain stimulation in  
518 individual participants.

## 519 7 References

- 520 Al'joboori, Yazi, Ricci Hannah, Francesca Lenham, Pia Borgas, Charlotte J. P. Kremers, Karen L. Bunday, John  
521 Rothwell, and Lynsey D. Duffell. 2021. "The Immediate and Short-Term Effects of Transcutaneous Spinal Cord  
522 Stimulation and Peripheral Nerve Stimulation on Corticospinal Excitability." *Frontiers in Neuroscience* 15.  
523 <https://www.frontiersin.org/articles/10.3389/fnins.2021.749042>.
- 524 Angeli, Claudia A., Maxwell Boakye, Rebekah A. Morton, Justin Vogt, Kristin Benton, Yangshen Chen, Christie K.  
525 Ferreira, and Susan J. Harkema. 2018. "Recovery of Over-Ground Walking after Chronic Motor Complete  
526 Spinal Cord Injury." *New England Journal of Medicine* 379 (13): 1244–50.  
527 <https://doi.org/10.1056/NEJMoa1803588>.
- 528 Asan, Ahmet S., James R. McIntosh, and Jason B. Carmel. 2022. "Targeting Sensory and Motor Integration for Recovery  
529 of Movement After CNS Injury." *Frontiers in Neuroscience* 15.  
530 <https://www.frontiersin.org/articles/10.3389/fnins.2021.791824>.
- 531 Benzel, Edward C., John Lancon, Lee Kesterson, and Theresa Hadden. 1991. "Cervical Laminectomy and Dentate  
532 Ligament Section for Cervical Spondylotic Myelopathy." *Clinical Spine Surgery* 4 (3): 286.
- 533 Brendler, Samuel J. 1968. "The Human Cervical Myotomes: Functional Anatomy Studied at Operation." *Journal of*  
534 *Neurosurgery* 28 (2): 105–11. <https://doi.org/10.3171/jns.1968.28.2.0105>.
- 535 Bunday, Karen L., and Monica A. Perez. 2012. "Motor Recovery after Spinal Cord Injury Enhanced by Strengthening  
536 Corticospinal Synaptic Transmission." *Current Biology* 22 (24): 2355–61.  
537 <https://doi.org/10.1016/j.cub.2012.10.046>.
- 538 Bunday, Karen L., M.A. Urbin, and Monica A. Perez. 2018. "Potentiating Paired Corticospinal-Motoneuronal Plasticity  
539 after Spinal Cord Injury." *Brain Stimulation* 11 (5): 1083–92. <https://doi.org/10.1016/j.brs.2018.05.006>.
- 540 Capogrosso, Marco, Nikolaus Wenger, Stanisa Raspopovic, Pavel Musienko, Janine Beauparlant, Lorenzo Bassi  
541 Luciani, Grégoire Courtine, and Silvestro Micera. 2013. "A Computational Model for Epidural Electrical  
542 Stimulation of Spinal Sensorimotor Circuits." *Journal of Neuroscience* 33 (49): 19326–40.  
543 <https://doi.org/10.1523/JNEUROSCI.1688-13.2013>.
- 544 Carhart, M.R., Jiping He, R. Herman, S. D'Luzansky, and W.T. Willis. 2004. "Epidural Spinal-Cord Stimulation  
545 Facilitates Recovery of Functional Walking Following Incomplete Spinal-Cord Injury." *IEEE Transactions on*  
546 *Neural Systems and Rehabilitation Engineering* 12 (1): 32–42. <https://doi.org/10.1109/TNSRE.2003.822763>.
- 547 Compston, Alastair. 2010. "Aids to the Investigation of Peripheral Nerve Injuries. Medical Research Council: Nerve  
548 Injuries Research Committee. His Majesty's Stationery Office: 1942; Pp. 48 (Iii) and 74 Figures and 7 Diagrams;  
549 with Aids to the Examination of the Peripheral Nervous System. By Michael O'Brien for the Guarantors of  
550 Brain. Saunders Elsevier: 2010; Pp. [8] 64 and 94 Figures." *Brain* 133 (10): 2838–44.  
551 <https://doi.org/10.1093/brain/awq270>.
- 552 Cowan, J M, B L Day, C Marsden, and J C Rothwell. 1986. "The Effect of Percutaneous Motor Cortex Stimulation on  
553 H Reflexes in Muscles of the Arm and Leg in Intact Man." *The Journal of Physiology* 377 (1): 333–47.  
554 <https://doi.org/10.1113/jphysiol.1986.sp016190>.
- 555 Deletis, V., and A. Bueno De Camargo. 2001. "Interventional Neurophysiological Mapping during Spinal Cord  
556 Procedures." *Stereotactic and Functional Neurosurgery* 77 (1–4): 25–28. <https://doi.org/10.1159/000064585>.
- 557 Deletis, Vedran, Francesco Sala, and Sedat Ulkatan. 2012. *Transcranial Electrical Stimulation and Intraoperative*  
558 *Neurophysiology of the Corticospinal Tract*. Edited by Charles M. Epstein, Eric M. Wassermann, and Ulf  
559 Ziemann. Vol. 1. Oxford University Press. <https://doi.org/10.1093/oxfordhb/9780198568926.013.0008>.
- 560 Deletis, Vedran, Kathleen Seidel, Francesco Sala, Andreas Raabe, Darko Chudy, Juergen Beck, and Karl F Kothbauer.  
561 2018. "Intraoperative Identification of the Corticospinal Tract and Dorsal Column of the Spinal Cord by  
562 Electrical Stimulation." *Journal of Neurology, Neurosurgery & Psychiatry* 89 (7): 754–61.  
563 <https://doi.org/10.1136/jnnp-2017-317172>.
- 564 Deuschl, G., R. Michels, A. Berardelli, E. Schenck, M. Inghilleri, and C. H. Lücking. 1991. "Effects of Electric and  
565 Magnetic Transcranial Stimulation on Long Latency Reflexes." *Experimental Brain Research* 83 (2): 403–10.  
566 <https://doi.org/10.1007/BF00231165>.
- 567 Di Lazzaro, Vincenzo, and John C. Rothwell. 2014. "Corticospinal Activity Evoked and Modulated by Non-Invasive  
568 Stimulation of the Intact Human Motor Cortex." *The Journal of Physiology* 592 (19): 4115–28.  
569 <https://doi.org/10.1113/jphysiol.2014.274316>.



- 570 Gad, Parag, Sujin Lee, Nicholas Terrafranca, Hui Zhong, Amanda Turner, Yury Gerasimenko, and V. Reggie Edgerton.  
571 2018. “Non-Invasive Activation of Cervical Spinal Networks after Severe Paralysis.” *Journal of Neurotrauma*  
572 35 (18): 2145–58. <https://doi.org/10.1089/neu.2017.5461>.
- 573 Gill, Megan L., Peter J. Grahn, Jonathan S. Calvert, Margaux B. Linde, Igor A. Lavrov, Jeffrey A. Strommen, Lisa A.  
574 Beck, et al. 2018. “Neuromodulation of Lumbosacral Spinal Networks Enables Independent Stepping after  
575 Complete Paraplegia.” *Nature Medicine* 24 (11): 1677–82. <https://doi.org/10.1038/s41591-018-0175-7>.
- 576 Greiner, Nathan, Beatrice Barra, Giuseppe Schiavone, Henri Lorach, Nicholas James, Sara Conti, Melanie Kaeser, et al.  
577 2021. “Recruitment of Upper-Limb Motoneurons with Epidural Electrical Stimulation of the Cervical Spinal  
578 Cord.” *Nature Communications* 12 (1): 435. <https://doi.org/10.1038/s41467-020-20703-1>.
- 579 Guiho, Thomas, Stuart N. Baker, and Andrew Jackson. 2021. “Epidural and Transcutaneous Spinal Cord Stimulation  
580 Facilitates Descending Inputs to Upper-Limb Motoneurons in Monkeys.” *Journal of Neural Engineering* 18 (4).  
581 <https://doi.org/10.1088/1741-2552/abe358>.
- 582 Guzmán-López, Jessica, João Costa, Aikaterini Selvi, Gonzalo Barraza, Jordi Casanova-Molla, and Josep Valls-Solé.  
583 2012. “The Effects of Transcranial Magnetic Stimulation on Vibratory-Induced Presynaptic Inhibition of the  
584 Soleus H Reflex.” *Experimental Brain Research* 220 (3): 223–30. <https://doi.org/10.1007/s00221-012-3131-7>.
- 585 Harris, Paul A., Robert Taylor, Brenda L. Minor, Veida Elliott, Michelle Fernandez, Lindsay O’Neal, Laura McLeod,  
586 et al. 2019. “The REDCap Consortium: Building an International Community of Software Platform Partners.”  
587 *Journal of Biomedical Informatics* 95 (July): 103208. <https://doi.org/10.1016/j.jbi.2019.103208>.
- 588 Harris, Paul A., Robert Taylor, Robert Thielke, Jonathon Payne, Nathaniel Gonzalez, and Jose G. Conde. 2009.  
589 “Research Electronic Data Capture (REDCap)—A Metadata-Driven Methodology and Workflow Process for  
590 Providing Translational Research Informatics Support.” *Journal of Biomedical Informatics* 42 (2): 377–81.  
591 <https://doi.org/10.1016/j.jbi.2008.08.010>.
- 592 Hofstoetter, Ursula S., and Karen Minassian. 2022. “Transcutaneous Spinal Cord Stimulation: Advances in an Emerging  
593 Non-Invasive Strategy for Neuromodulation.” *Journal of Clinical Medicine* 11 (13): 3836.  
594 <https://doi.org/10.3390/jcm11133836>.
- 595 Inanici, Fatma, Lorie N. Brighton, Soshi Samejima, Christoph P. Hofstetter, and Chet T. Moritz. 2021. “Transcutaneous  
596 Spinal Cord Stimulation Restores Hand and Arm Function After Spinal Cord Injury.” *IEEE Transactions on*  
597 *Neural Systems and Rehabilitation Engineering* 29: 310–19. <https://doi.org/10.1109/TNSRE.2021.3049133>.
- 598 Inanici, Fatma, Soshi Samejima, Parag Gad, V. Reggie Edgerton, Christoph P. Hofstetter, and Chet T. Moritz. 2018.  
599 “Transcutaneous Electrical Spinal Stimulation Promotes Long-Term Recovery of Upper Extremity Function in  
600 Chronic Tetraplegia.” *IEEE Transactions on Neural Systems and Rehabilitation Engineering* 26 (6): 1272–78.  
601 <https://doi.org/10.1109/TNSRE.2018.2834339>.
- 602 Jackson, Andrew, Jaideep Mavoori, and Eberhard E. Fetz. 2006. “Long-Term Motor Cortex Plasticity Induced by an  
603 Electronic Neural Implant.” *Nature* 444 (7115): 56–60. <https://doi.org/10.1038/nature05226>.
- 604 Knikou, Maria. 2014. “Transspinal and Transcortical Stimulation Alter Corticospinal Excitability and Increase Spinal  
605 Output.” *PLoS ONE* 9 (7): e102313. <https://doi.org/10.1371/journal.pone.0102313>.
- 606 Lehky, Sidney R., Terrence J. Sejnowski, and Robert Desimone. 2005. “Selectivity and Sparseness in the Responses of  
607 Striate Complex Cells.” *Vision Research* 45 (1): 57–73. <https://doi.org/10.1016/j.visres.2004.07.021>.
- 608 Liang, Lucy, Arianna Damiani, Matteo Del Brocco, Evan R. Rogers, Maria K. Jantz, Lee E. Fisher, Robert A. Gaunt,  
609 Marco Capogrosso, Scott F. Lempka, and Elvira Pirondini. 2023. “A Systematic Review of Computational  
610 Models for the Design of Spinal Cord Stimulation Therapies: From Neural Circuits to Patient-Specific  
611 Simulations.” *The Journal of Physiology* 601 (15): 3103–21. <https://doi.org/10.1113/JP282884>.
- 612 Mazzocchio, Riccardo, Giovanni Battista Scarfò, Aldo Mariottini, Vitaliano Francesco Muzii, and Lucio Palma. 2001.  
613 “Recruitment Curve of the Soleus H-Reflex in Chronic Back Pain and Lumbosacral Radiculopathy.” *BMC*  
614 *Musculoskeletal Disorders* 2 (October): 4. <https://doi.org/10.1186/1471-2474-2-4>.
- 615 McIntosh, James R., Evan F. Joiner, Jacob L. Goldberg, Lynda M. Murray, Bushra Yasin, Anil Mendiratta, Steven C.  
616 Karceski, et al. 2023. “Intraoperative Electrical Stimulation of the Human Dorsal Spinal Cord Reveals a Map of  
617 Arm and Hand Muscle Responses.” *Journal of Neurophysiology* 129 (1): 66–82.  
618 <https://doi.org/10.1152/jn.00235.2022>.
- 619 Mills, K. R., and N. M. F. Murray. 1986. “Electrical Stimulation over the Human Vertebral Column: Which Neural  
620 Elements Are Excited?” *Electroencephalography and Clinical Neurophysiology* 63 (6): 582–89.  
621 [https://doi.org/10.1016/0013-4694\(86\)90145-8](https://doi.org/10.1016/0013-4694(86)90145-8).

- 622 Minassian, K., B. Jilge, F. Rattay, M. M. Pinter, H. Binder, F. Gerstenbrand, and M. R. Dimitrijevic. 2004. “Stepping-  
623 like Movements in Humans with Complete Spinal Cord Injury Induced by Epidural Stimulation of the Lumbar  
624 Cord: Electromyographic Study of Compound Muscle Action Potentials.” *Spinal Cord* 42 (7): 401–16.  
625 <https://doi.org/10.1038/sj.sc.3101615>.
- 626 Mishra, Asht M., Ajay Pal, Disha Gupta, and Jason B. Carmel. 2017. “Paired Motor Cortex and Cervical Epidural  
627 Electrical Stimulation Timed to Converge in the Spinal Cord Promotes Lasting Increases in Motor Responses.”  
628 *The Journal of Physiology* 595 (22): 6953–68. <https://doi.org/10.1113/JP274663>.
- 629 Nishimura, Yukio, Steve I. Perlmuter, Ryan W. Eaton, and Eberhard E. Fetz. 2013. “Spike-Timing-Dependent  
630 Plasticity in Primate Corticospinal Connections Induced during Free Behavior.” *Neuron* 80 (5): 1301–9.  
631 <https://doi.org/10.1016/j.neuron.2013.08.028>.
- 632 Pal, Ajay, HongGeun Park, Aditya Ramamurthy, Ahmet S Asan, Thelma Bethea, Meenu Johnkutty, and Jason B Carmel.  
633 2022. “Spinal Cord Associative Plasticity Improves Forelimb Sensorimotor Function after Cervical Injury.”  
634 *Brain*, September, awac235. <https://doi.org/10.1093/brain/awac235>.
- 635 Poon, David E., Francois D. Roy, Monica A. Gorassini, and Richard B. Stein. 2008. “Interaction of Paired Cortical and  
636 Peripheral Nerve Stimulation on Human Motor Neurons.” *Experimental Brain Research* 188 (1): 13–21.  
637 <https://doi.org/10.1007/s00221-008-1334-8>.
- 638 Powell, Marc P., Nikhil Verma, Erynn Sorensen, Erick Carranza, Amy Boos, Daryl P. Fields, Souvik Roy, et al. 2023.  
639 “Epidural Stimulation of the Cervical Spinal Cord for Post-Stroke Upper-Limb Paresis.” *Nature Medicine* 29  
640 (3): 689–99. <https://doi.org/10.1038/s41591-022-02202-6>.
- 641 Rowald, Andreas, Salif Komi, Robin Demesmaeker, Edeny Baaklini, Sergio Daniel Hernandez-Charpak, Edoardo  
642 Paoles, Hazael Montanaro, et al. 2022. “Activity-Dependent Spinal Cord Neuromodulation Rapidly Restores  
643 Trunk and Leg Motor Functions after Complete Paralysis.” *Nature Medicine*, February, 1–12.  
644 <https://doi.org/10.1038/s41591-021-01663-5>.
- 645 Roy, François D., Dillen Bosgra, and Richard B. Stein. 2014. “Interaction of Transcutaneous Spinal Stimulation and  
646 Transcranial Magnetic Stimulation in Human Leg Muscles.” *Experimental Brain Research* 232 (6): 1717–28.  
647 <https://doi.org/10.1007/s00221-014-3864-6>.
- 648 Seeman, Stephanie C., Brian J. Mogen, Eberhard E. Fetz, and Steve I. Perlmuter. 2017. “Paired Stimulation for Spike-  
649 Timing-Dependent Plasticity in Primate Sensorimotor Cortex.” *The Journal of Neuroscience* 37 (7): 1935–49.  
650 <https://doi.org/10.1523/JNEUROSCI.2046-16.2017>.
- 651 Stefan, Katja, Erwin Kunesch, Leonardo G. Cohen, Reiner Benecke, and Joseph Classen. 2000. “Induction of Plasticity  
652 in the Human Motor Cortex by Paired Associative Stimulation.” *Brain* 123 (3): 572–84.  
653 <https://doi.org/10.1093/brain/123.3.572>.
- 654 Szelényi, Andrea, Karl F. Kothbauer, and Vedran Deletis. 2007. “Transcranial Electric Stimulation for Intraoperative  
655 Motor Evoked Potential Monitoring: Stimulation Parameters and Electrode Montages.” *Clinical  
656 Neurophysiology* 118 (7): 1586–95. <https://doi.org/10.1016/j.clinph.2007.04.008>.
- 657 Taylor, Janet L., and Peter G. Martin. 2009. “Voluntary Motor Output Is Altered by Spike-Timing-Dependent Changes  
658 in the Human Corticospinal Pathway.” *Journal of Neuroscience* 29 (37): 11708–16.  
659 <https://doi.org/10.1523/JNEUROSCI.2217-09.2009>.
- 660 Wagner, Fabien B., Jean-Baptiste Mignardot, Camille G. Le Goff-Mignardot, Robin Demesmaeker, Salif Komi, Marco  
661 Capogrosso, Andreas Rowald, et al. 2018. “Targeted Neurotechnology Restores Walking in Humans with Spinal  
662 Cord Injury.” *Nature* 563 (7729): 65–71. <https://doi.org/10.1038/s41586-018-0649-2>.
- 663 Wolpaw, Jonathan R. 2010. “What Can the Spinal Cord Teach Us about Learning and Memory?” *The Neuroscientist* 16  
664 (5): 532–49. <https://doi.org/10.1177/1073858410368314>.
- 665 Wolpert, Daniel M., Jörn Diedrichsen, and J. Randall Flanagan. 2011. “Principles of Sensorimotor Learning.” *Nature  
666 Reviews. Neuroscience* 12 (12): 739–51. <https://doi.org/10.1038/nrn3112>.
- 667 Yang, Qi, Aditya Ramamurthy, Sophia Lall, Joshua Santos, Shivakeshavan Ratnadurai-Giridharan, Madeleine Lopane,  
668 Neela Zareen, et al. 2019. “Independent Replication of Motor Cortex and Cervical Spinal Cord Electrical  
669 Stimulation to Promote Forelimb Motor Function after Spinal Cord Injury in Rats.” *Experimental Neurology*  
670 320 (October): 112962. <https://doi.org/10.1016/j.expneurol.2019.112962>.
- 671  
672

673 **8 Figures**

674

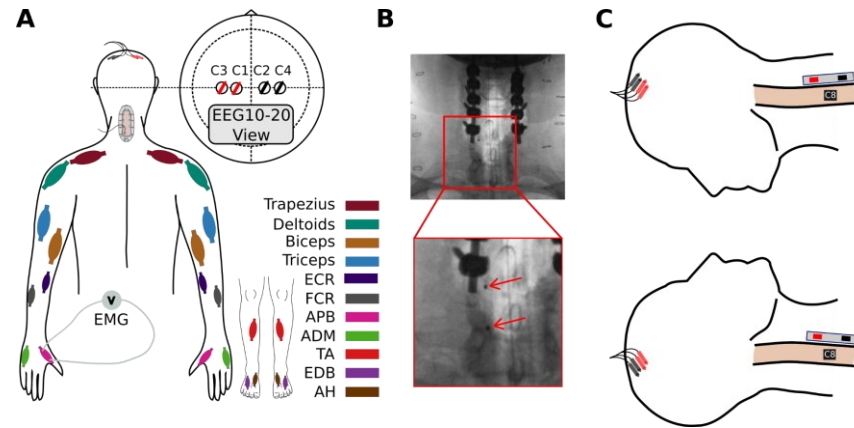

**Figure 1. Epidural spinal cord and brain stimulation experiment during posterior and anterior cervical spine surgery.** *A*, Colors correspond to different recorded muscles (see legend). Subdermal needles were placed for brain stimulation. Catheter electrode shown placed below the lamina on the posterior aspect of the spinal cord. *B*, Example of catheter placement targeting dorsal root fibres, relative to bony anatomy when the posterior aspect of the spinal cord is being stimulated. X-ray was acquired after surgical instrumentation but prior to removal of the catheter. Red arrows indicate the contacts of the catheter electrode. *C*, The catheter electrode was used to stimulate the posterior (top) or anterior (bottom) aspect of the spinal cord in different participants. The posterior location targets the dorsal root entry zone, while the anterior location targets the ventral root exit.

675

676

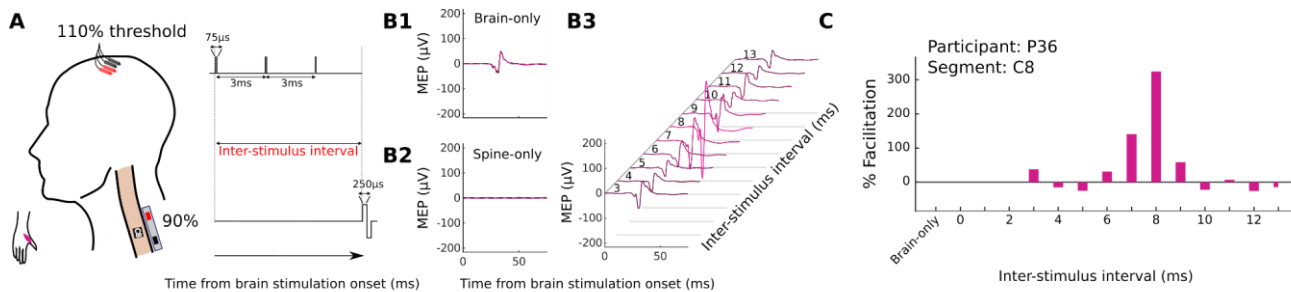

**Figure 2. Experimental paradigm and results of varying the timing of spinal stimulation relative to transcranial electrical stimulation (tES) in a single participant.** *A*, Schematic: three pulses are delivered over the motor cortex followed by a variable period of time (inter-stimulus interval; ISI) before a single pulse is delivered to the spinal cord. The catheter electrode was positioned over the C8 dorsal spinal cord, and the abductor pollicis brevis (APB) was the target muscle. *B1*, Brain-only baseline condition. The intensity of cortical stimulation was set to 110% of the APB threshold, ensuring a small MEP in the brain-only condition. *B2*, Spinal baseline condition. The intensity of spinal stimulation was set to 90% of the APB threshold, so no MEP was observed with spinal-only stimulation. *B3*, Paired stimulation. Averaged responses over 5 trials with variable ISI. *C*, Quantification of pairing facilitation. The facilitation is calculated relative to the brain-only MEP size. Facilitation of 324% was observed when the inter-stimulus interval was set to 8 milliseconds.

677

678

It is made available under a [CC-BY-NC-ND 4.0 International license](https://creativecommons.org/licenses/by-nc-nd/4.0/).

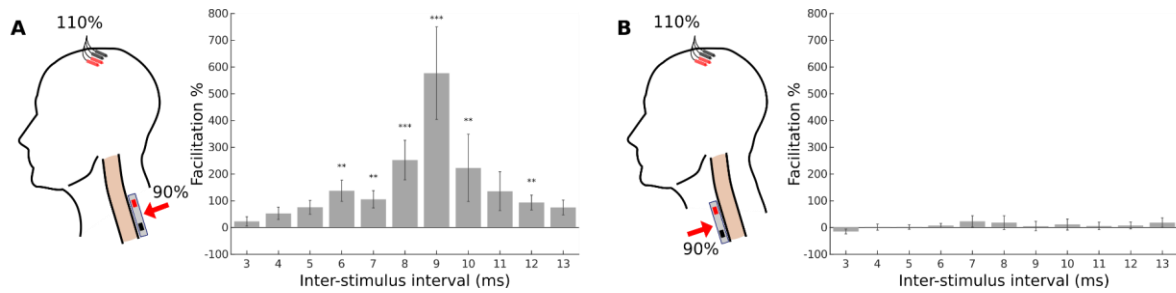

**Figure 3. Augmentation of motor cortex MEPs with posterior, but not anterior, spinal stimulation.** **A**, Schematic: 110% threshold transcortical electrical stimulation is combined with 90% threshold posterior cervical spinal stimulation. A strong facilitation is present when averaging across participants ( $n = 38$ , 23M/15F). **B**, Schematic: as in **A** but cervical stimulation applied to the anterior aspect of the spinal cord. Anterior stimulation results in no observable facilitation ( $n = 12$ , 4M/8F). Across-participant signed-rank test,  $*p < .05$ ,  $**p < .01$ ,  $***p < .001$ , Bonferroni corrected for multiple comparisons.

679

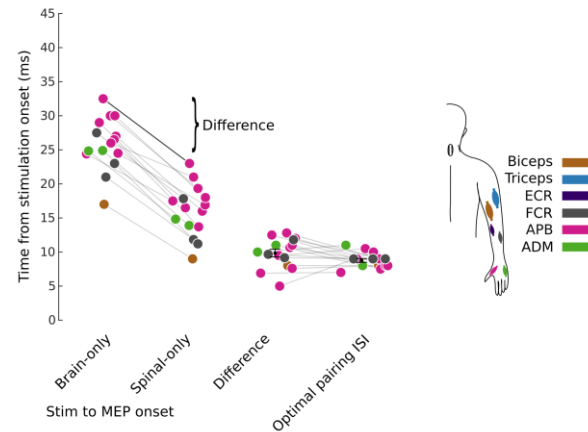

**Figure 4. Estimate of optimal pairing ISI from brain and spinal MEP onset times.** Subtracting the brain-only MEP onset time from the spinal-only MEP onset time produces a difference in the onset times ( $9.8 \pm 0.6$ ms) which acts as an estimate of the spinal cord convergence time. This estimate is not significantly different from the estimate of the optimal pairing ISI ( $8.8 \pm 0.3$ ms;  $p = 0.15$ , signed-rank test). Onset times for brain-only and spinal-only MEPs were estimated programmatically and refined manually. The programmatic detection extracted the first time point where the MEP magnitude was nine times its pre-stimulation standard deviation. This time point was then further refined by tracing the MEP back to its x-axis crossing. The optimal pairing ISI was estimated by taking the time of maximum facilitation for all cases where facilitation was greater than 50%. Connecting lines represent the same participant. Marker colours correspond to targeted muscles. Data shown only for participants ( $n = 15$ , 9M/6F) where an estimate of the brain-only, spinal-only and optimal pairing ISI could be made.

680

681

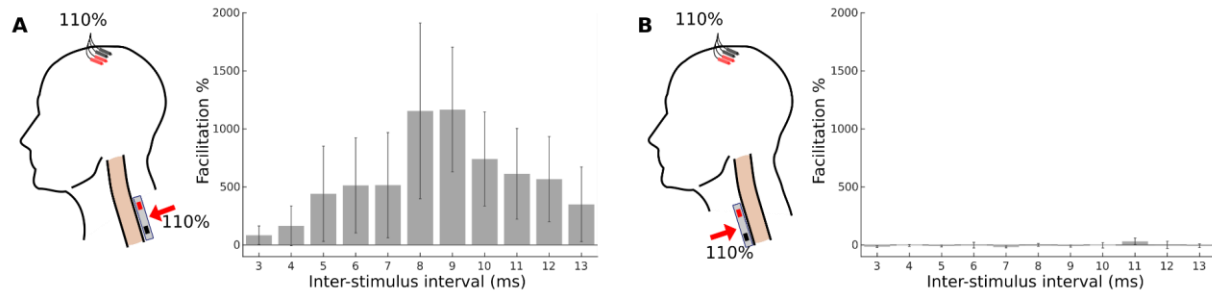

**Figure 5. Suprathreshold posterior but not anterior spinal cord stimulation produces synergistic effects when paired with suprathreshold tES.** **A**, Schematic: 110% threshold transcortical electrical stimulation is combined with 110% threshold posterior cervical spinal stimulation. A strong facilitation is present when averaging across participants ( $n = 10$ , 6M/4F). The peak facilitation is 1174% at 9ms relative to the sum of brain-only and spinal-only stimulation. **B**, Schematic: as in **A** but cervical stimulation applied to the anterior aspect of the spinal cord. In contrast, posterior aspect stimulation anterior stimulation results in no observable facilitation ( $n = 8$ , 3M/5F; peak facilitation = 38% at 11 ms).

682

683

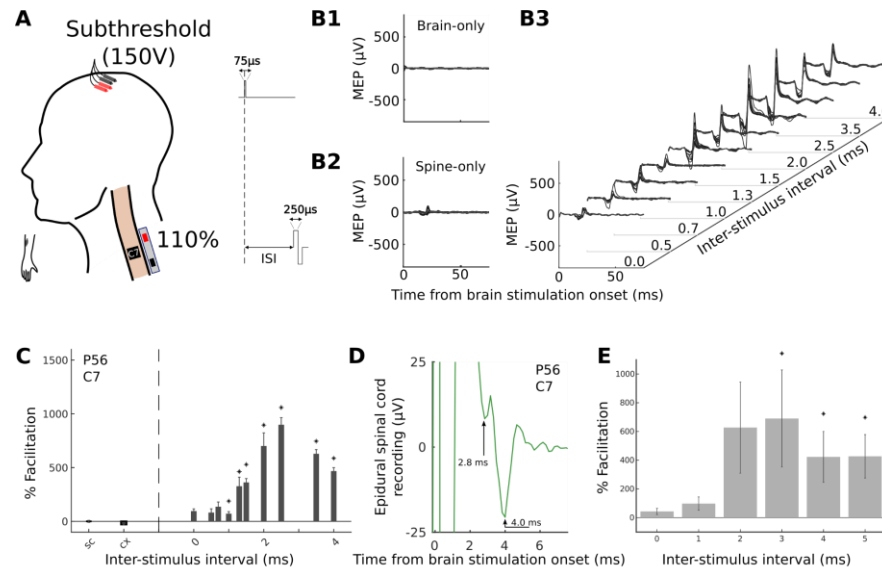

**Figure 6. Facilitation occurs 2-3ms after cortical stimulation.** **A**, Schematic: Subthreshold (150V) single pulse transcortical electrical stimulation is combined with 110% threshold posterior cervical spinal stimulation. Example for an individual participant (P56). The catheter electrode was positioned over the C7 dorsal root entry zone (DREZ) of the spinal cord and the FCR was the target muscle. **B1**, Brain-only baseline condition. The intensity of transcranial stimulation was set to 150 V and no MEP was present below the maximum tested 300 V. **B2**, Spinal-only baseline condition. The intensity of spinal stimulation was set to 110% of the target threshold needed to induce a motor evoked potential (MEP). **B3**, Paired stimulation. Averaged responses over 10 trials with variable ISI. **C**, Quantification of pairing facilitation. The facilitation is calculated relative to the spinal-only MEP size. While the peak facilitation appears to be at 2.5 ms, the earliest facilitation appears to be in the range 1-1.5 ms. **D**, Epidural spinal recordings. Brain-only stimulation was applied while a recording was made from the spinal electrode. A deflection is visible starting at 2.8 ms with the maximal deflection occurring at 4 ms. The stimulation artefact prior to 2.5 ms has been clipped for visualisation purposes. **E**, Average over participants ( $n = 11$ , 4M/7F) receiving subthreshold (77-288 V) single pulse transcortical electrical stimulation combined with 110% threshold posterior cervical spinal stimulation. The optimal ISI when single pulse cortical stimulation is used is 3ms.

684

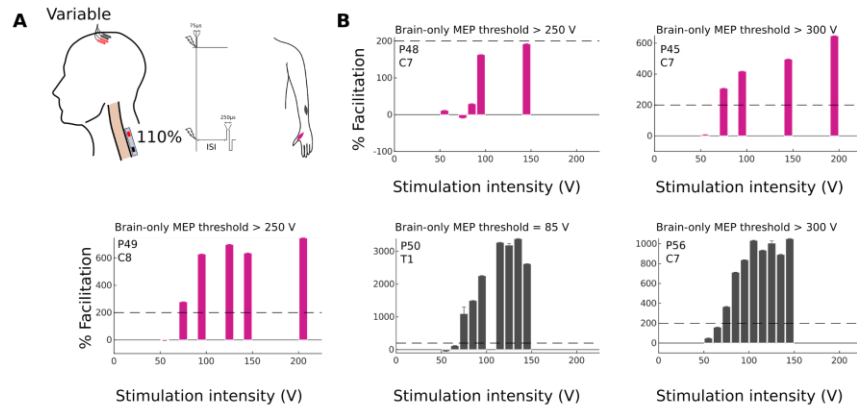

**Figure 7. Suprathreshold spinal MEPs are strongly facilitated by extremely subthreshold single pulse transcranial electrical stimulation.** **A**, Schematic: a single pulse delivered to the brain and spinal cord and choice of stimulation intensities. **B**, Cortical stimulation intensity was adjusted upwards from 50V while spinal stimulation intensity was maintained at 110% of threshold ( $n = 5$ , 1M/4F). Pairing was applied at the optimal inter-stimulus interval as determined in a previous experiment. Facilitation is initiated between 50V and 100 V in all cases, which is considerably lower than the threshold for brain-only stimulation in the majority of experiments (see text in figures). Bar colours correspond to the targeted muscle as shown in A.

685

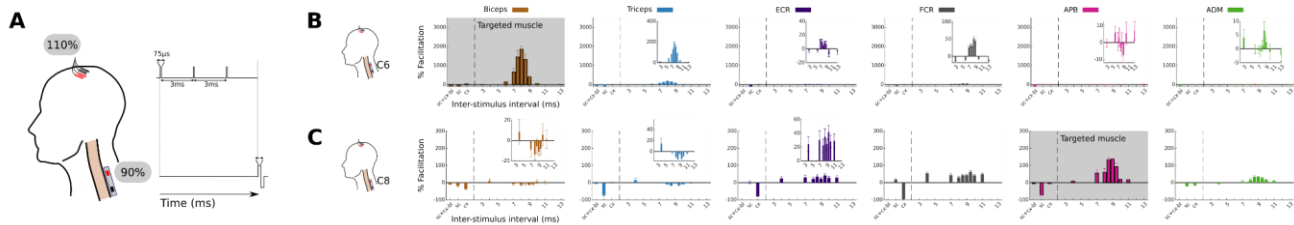

**Figure 8. Facilitation is greatest in targeted muscles.** **A**, Schematic: a triple pulse stimulation delivered to the brain and single pulse stimulation delivered to the spinal cord. For the muscle that was optimised for, intensity of brain stimulation was set to be 110% of threshold, and the intensity of spine stimulation was set to be 90% of threshold. The baseline condition used for normalisation is the sum of brain-only and spinal-only MEPs. **B**, In one example participant, the catheter electrode was positioned over the C6 dorsal root entry zone (DREZ) of the spinal cord and the Biceps muscle was targeted. Facilitation was strong in the targeted muscle and present in muscles innervated at nearby segments. Shoulder and leg muscles omitted for visualisation purposes. **C**, In a different participant, the catheter electrode was placed over the C8 DREZ and the APB was targeted. Strong facilitation was present in the target muscle but was also present in ECR and FCR.

686

687

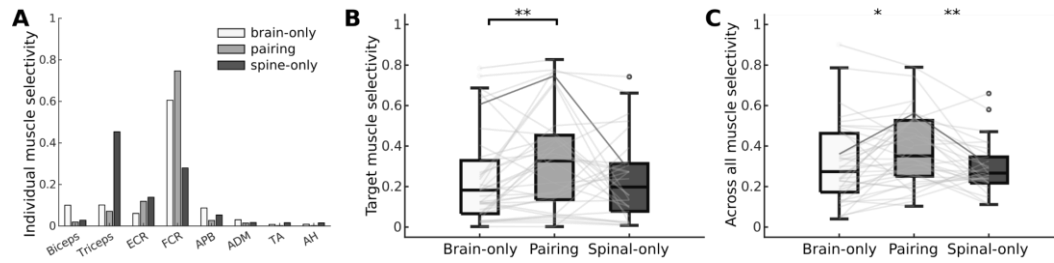

**Figure 9. Paired brain and spine stimulation yields more selective activation of individual muscles.** **A**, Example of individual muscle selectivity from a single participant showing that for the FCR and APB the selectivity of pairing is larger than for either brain-only or spinal-only stimulation alone. **B**, Selectivity as in **A** can be pooled across participants ( $n = 38$ , 23M/15F) by selecting the selectivity corresponding to the target muscle from each participant. Median target muscle selectivity is higher for pairing stimulation than for brain-only stimulation. While it is also higher for pairing stimulation than spinal-only stimulation this difference is not statistically significant. **C**, Across muscle selectivity measures the selectivity of muscle activation irrespective of the target muscle and is higher for pairing stimulation than for both brain-only stimulation and spinal-only stimulation ( $n = 38$ , 23M/15F). For **B** and **C**: Individual lines correspond to individual participants. Dark line corresponds to the participant shown in **A**. Hinges represent 1st and 3rd quartile, and whiskers span the range of the data not considered outliers (defined as  $q3 + 1.5 \times (q3 - q1)$  or less than  $q1 - 1.5 \times (q3 - q1)$ ).

688

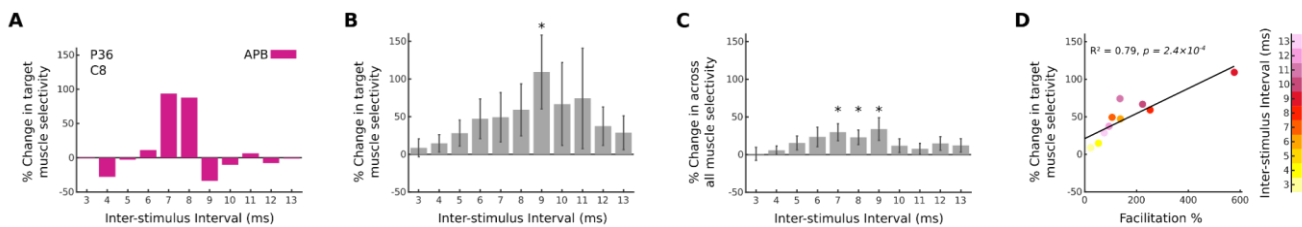

**Figure 10. Activation of muscles is most selective near optimum inter-stimulus intervals.** **A**, Example of target muscle selectivity (APB) from a single participant. Change in selectivity of pairing from brain- and spinal-only is strongest at an inter-stimulus interval of 7-8 ms. 0% change in selectivity indicates that pairing selectivity is the same as the selectivity computed on the sum of the brain-only (110%) and spinal-only (90%) MEP-size. **B**, Selectivity change as in **A** can be pooled across participants ( $n = 38$ , 23M/15F) by choosing the selectivity corresponding to the target muscle from each participant. Average target selectivity is highest at an ISI of 9 ms, corresponding to the timing of optimal pairing. **C**, Change in the across muscle selectivity measure also shows the highest selectivity to be at an ISI of 9 ms, albeit at lower magnitude. Across-participant signed-rank test,  $*p < .05$ , not corrected for multiple comparisons ( $n = 38$ , 23M/15F). **D**, The selectivity change (as in **B**) increases (t-test,  $n = 38$ , 23M/15F) as the facilitation increases with varying ISI (Fig. 3A).

689

690

It is made available under a [CC-BY-NC-ND 4.0 International license](https://creativecommons.org/licenses/by-nc-nd/4.0/).

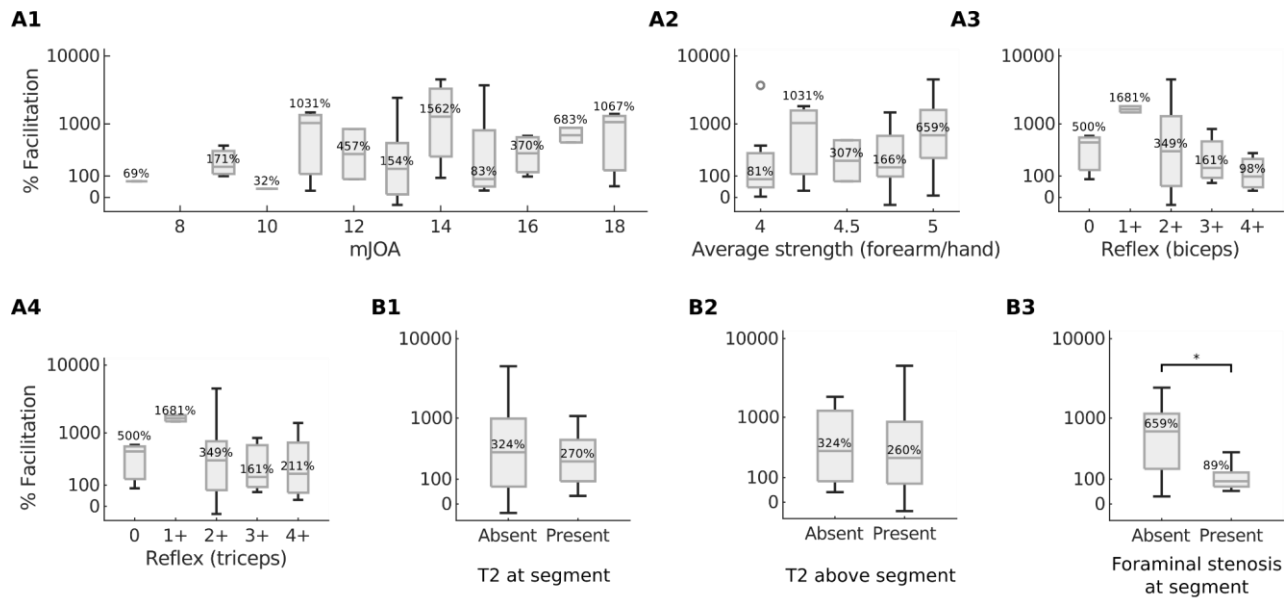

**Figure 11. No relation between immediate effect size and degree of impairment.** **A1**, mJOA. **A2**, Average strength in the forearm and hand (MRC scale). **A3**, Biceps reflex score. **A4**, Triceps reflex score. **B1**, Hyperintensity on T2-weighted MRI signal at the stimulated segment. **B2**, T2 hyperintensity above the stimulated segment. **B3**, Severe foraminal stenosis at the stimulated segment. Text represents median % facilitation. Across-participant signed-rank test,  $*p < .05$ , no correction for multiple comparisons was applied.



692 **9 Tables**

**Table 1. Summary clinical characteristics of all participants separated by posterior vs anterior spinal cord stimulation.**

|                           | All         | Posterior*  | Anterior*   | p**   |
|---------------------------|-------------|-------------|-------------|-------|
| Total:                    | 59, (100%)  | 47, (100%)  | 13, (100%)  |       |
| Age***                    |             |             |             | 0.489 |
| 30-49                     | 6, (10.2%)  | 4, (8.5%)   | 2, (15.4%)  |       |
| 50-64                     | 22, (37.3%) | 19, (40.4%) | 4, (30.8%)  |       |
| 65+                       | 31, (52.5%) | 24, (51.1%) | 7, (53.8%)  |       |
| Sex                       |             |             |             | 0.233 |
| F                         | 27, (45.8%) | 20, (42.6%) | 8, (61.5%)  |       |
| M                         | 32, (54.2%) | 27, (57.4%) | 5, (38.5%)  |       |
| mJOA                      |             |             |             | 0.394 |
| 1-12                      | 15, (25.4%) | 11, (23.4%) | 5, (38.5%)  |       |
| 13-15                     | 28, (47.5%) | 22, (46.8%) | 6, (46.2%)  |       |
| 16-18                     | 16, (27.1%) | 14, (29.8%) | 2, (15.4%)  |       |
| Axial neck pain           |             |             |             | 0.971 |
| Y                         | 36, (61%)   | 29, (61.7%) | 8, (61.5%)  |       |
| N                         | 19, (32.2%) | 15, (31.9%) | 4, (30.8%)  |       |
| U                         | 4, (6.8%)   | 3, (6.4%)   | 1, (7.7%)   |       |
| Radiating pain            |             |             |             | 0.899 |
| Y                         | 29, (49.2%) | 23, (48.9%) | 6, (46.2%)  |       |
| N                         | 26, (44.1%) | 21, (44.7%) | 6, (46.2%)  |       |
| U                         | 4, (6.8%)   | 3, (6.4%)   | 1, (7.7%)   |       |
| Weakness                  |             |             |             | 0.808 |
| Y                         | 46, (78%)   | 36, (76.6%) | 10, (76.9%) |       |
| N                         | 10, (16.9%) | 9, (19.1%)  | 2, (15.4%)  |       |
| U                         | 3, (5.1%)   | 2, (4.3%)   | 1, (7.7%)   |       |
| Unsteady gait             |             |             |             | 0.728 |
| Y                         | 38, (64.4%) | 30, (63.8%) | 9, (69.2%)  |       |
| N                         | 21, (35.6%) | 17, (36.2%) | 4, (30.8%)  |       |
| Hyperreflexia             |             |             |             | 0.069 |
| Y                         | 30, (50.8%) | 26, (55.3%) | 4, (30.8%)  |       |
| N                         | 22, (37.3%) | 15, (31.9%) | 8, (61.5%)  |       |
| U                         | 7, (11.9%)  | 6, (12.8%)  | 1, (7.7%)   |       |
| Sphincter Dysfunction     |             |             |             | 0.312 |
| Y                         | 5, (8.5%)   | 3, (6.4%)   | 2, (15.4%)  |       |
| N                         | 54, (91.5%) | 44, (93.6%) | 11, (84.6%) |       |
| Severe Foraminal Stenosis |             |             |             | 0.816 |
| Y                         | 41, (69.5%) | 32, (68.1%) | 9, (69.2%)  |       |
| N                         | 15, (25.4%) | 12, (25.5%) | 4, (30.8%)  |       |
| U                         | 3, (5.1%)   | 3, (6.4%)   | 0, (0.0%)   |       |
| T2 Signal Change          |             |             |             | 0.424 |
| Y                         | 45, (76.3%) | 36, (76.6%) | 9, (69.2%)  |       |
| N                         | 12, (20.3%) | 9, (19.1%)  | 4, (30.8%)  |       |
| U                         | 2, (3.4%)   | 2, (4.3%)   | 0, (0.0%)   |       |
| Racial category           |             |             |             |       |
| Asian                     | 2, (3.4%)   | 1, (2.1%)   | 1, (7.7%)   |       |
| Black or African American | 8, (13.6%)  | 6, (12.8%)  | 2, (15.4%)  |       |
| More than one Race        | 2, (3.4%)   | 1, (2.1%)   | 2, (15.4%)  |       |
| Unspecified               | 17, (28.8%) | 15, (31.9%) | 2, (15.4%)  |       |
| White                     | 30, (50.8%) | 24, (51.1%) | 6, (46.2%)  |       |
| Ethnic category           |             |             |             |       |
| Hispanic                  | 5, (8.5%)   | 5, (10.6%)  | 1, (7.7%)   |       |
| Not Hispanic              | 43, (72.9%) | 33, (70.2%) | 10, (76.9%) |       |
| Unspecified               | 11, (18.6%) | 9, (19.1%)  | 2, (15.4%)  |       |

\*A single participant took part in both anterior and posterior portions of the experiment. \*\*Wilcoxon Rank Sum test. No correction for multiple comparisons was applied. \*\*\*At the time of surgery. mJOA, modified Japanese Orthopaedic Association (mJOA) score. No - N, Yes - Y, Unknown/Unspecified - U. Severe foraminal stenosis is defined as no visible fat around the nerve root within the foramen. Severe foraminal stenosis and T2 signal change were assessed between C4 and T1 segments.

## 694 **10 Supporting information**

695 10.1 Tested experimental conditions.

**Supporting Information Table 1. Tested experimental conditions.**

|        | Posterior, Triple-pulse<br>tES (110%) – SCS (90%) | Posterior, Triple-pulse<br>tES (110%) – SCS (110%) | Posterior, Single-pulse<br>tES (<100%) – SCS (110%) | Anterior, Triple-pulse<br>tES (110%) – SCS (90%) | Anterior, Triple-pulse<br>tES (110%) – SCS (90%) |
|--------|---------------------------------------------------|----------------------------------------------------|-----------------------------------------------------|--------------------------------------------------|--------------------------------------------------|
| P01    | C8R-APB                                           | C8R-APB                                            |                                                     |                                                  |                                                  |
| P02    | C8L-APB                                           |                                                    |                                                     |                                                  |                                                  |
| P03    | C8L-APB                                           | C8L-APB                                            |                                                     |                                                  |                                                  |
| P04    | C7R-Triceps                                       |                                                    |                                                     |                                                  |                                                  |
| P05    | C8L-ADM                                           |                                                    |                                                     |                                                  |                                                  |
| P06    | C8R-APB                                           |                                                    |                                                     |                                                  |                                                  |
| P07    |                                                   |                                                    |                                                     | C7R-Triceps                                      | C7R-Triceps                                      |
| P08    | C8L-APB                                           |                                                    |                                                     |                                                  |                                                  |
| P09    | T1R-ADM                                           |                                                    |                                                     |                                                  |                                                  |
| P10    | C8R-APB                                           |                                                    |                                                     |                                                  |                                                  |
| P11    |                                                   |                                                    |                                                     | C8R-APB                                          |                                                  |
| P12    |                                                   |                                                    |                                                     | C6L-Biceps                                       | C6L-Biceps                                       |
| P13    |                                                   |                                                    |                                                     | C7R-APB                                          | C7R-APB                                          |
| P14    |                                                   |                                                    |                                                     | T1R-APB                                          |                                                  |
| P15    | C8R-Biceps                                        |                                                    |                                                     |                                                  |                                                  |
| P16    | C6R-APB                                           |                                                    |                                                     |                                                  |                                                  |
| P17    | C7L-Biceps                                        |                                                    |                                                     |                                                  |                                                  |
| P18    |                                                   |                                                    |                                                     | C8R-APB                                          |                                                  |
| P19    | C8L-ADM                                           |                                                    |                                                     | C7L-ADM                                          |                                                  |
| P20    | C7R-APB                                           |                                                    |                                                     |                                                  |                                                  |
| P21    | C5L-Triceps                                       |                                                    |                                                     |                                                  |                                                  |
| P22    |                                                   |                                                    |                                                     | C8L-APB                                          | C8L-APB                                          |
| P23    | C7R-Triceps                                       |                                                    |                                                     |                                                  |                                                  |
| P24    | C6R-Biceps                                        |                                                    |                                                     |                                                  |                                                  |
| P25    | C7R-APB                                           |                                                    |                                                     |                                                  |                                                  |
| P26    | C8L-APB                                           |                                                    |                                                     |                                                  |                                                  |
| P27    | C8L-APB                                           |                                                    |                                                     |                                                  |                                                  |
| P28    |                                                   |                                                    |                                                     | C8R-APB                                          |                                                  |
| P29    | C8L-APB                                           |                                                    |                                                     |                                                  |                                                  |
| P30    | C7L-Triceps                                       |                                                    |                                                     |                                                  |                                                  |
| P31    | C7L-APB                                           |                                                    |                                                     |                                                  |                                                  |
| P32    | C7R-APB                                           | C7R-FCR                                            |                                                     |                                                  |                                                  |
| P33    | C7L-FCR                                           | C7L-FCR                                            |                                                     |                                                  |                                                  |
| P34    | C7L-ADM                                           |                                                    |                                                     |                                                  |                                                  |
| P35    | C7R-ADM                                           |                                                    |                                                     |                                                  |                                                  |
| P36    | C8L-APB                                           |                                                    |                                                     |                                                  |                                                  |
| P37    | C8L-APB                                           |                                                    |                                                     |                                                  |                                                  |
| P38    | C8L-APB                                           | C8L-APB                                            |                                                     |                                                  |                                                  |
| P39    | C8L-APB                                           |                                                    |                                                     |                                                  |                                                  |
| P40    |                                                   | C8L-APB                                            | C8L-APB                                             |                                                  |                                                  |
| P41    | C8R-APB                                           | C8R-APB                                            | C8R-APB                                             |                                                  |                                                  |
| P42    | C8R-APB                                           | C8L-APB                                            |                                                     |                                                  |                                                  |
| P43    | C8R-APB                                           |                                                    |                                                     |                                                  |                                                  |
| P44    | C8L-APB                                           | C8L-APB                                            | C8L-APB                                             |                                                  |                                                  |
| P45    |                                                   | C7L-APB                                            | C7L-APB                                             |                                                  |                                                  |
| P46    | T1R-APB                                           | T1R-FCR                                            | T1R-FCR                                             |                                                  |                                                  |
| P47    |                                                   |                                                    | C8L-FCR                                             |                                                  |                                                  |
| P48    |                                                   | C7R-APB                                            | C7R-FCR                                             |                                                  |                                                  |
| P49    | C8L-APB                                           | C8L-APB                                            | C8L-APB                                             |                                                  |                                                  |
| P50    | T1R-FCR                                           | T1R-FCR                                            | T1R-FCR                                             |                                                  |                                                  |
| P51    |                                                   |                                                    |                                                     | C8L-APB                                          | C8L-APB                                          |
| P52    |                                                   |                                                    |                                                     |                                                  | C6L-ECR                                          |
| P53    |                                                   |                                                    |                                                     | C8L-APB                                          | C8L-APB                                          |
| P54    |                                                   | C8L-APB                                            | C8L-APB                                             |                                                  |                                                  |
| P55    | C8L-FCR                                           |                                                    |                                                     |                                                  |                                                  |
| P56    |                                                   |                                                    | C7R-FCR                                             |                                                  |                                                  |
| P57    |                                                   | C8R-ECR                                            |                                                     |                                                  |                                                  |
| P58    |                                                   |                                                    | C7L-FCR                                             |                                                  |                                                  |
| P59    |                                                   |                                                    |                                                     | C8R-APB                                          | C8R-APB                                          |
| Total: | 38                                                | 10                                                 | 11                                                  | 12                                               | 8                                                |

For each participant, the site of epidural spinal cord stimulation (SCS), side of the body (L/R), and name of the target muscle, is listed for each paired condition tested. Percentages refer to threshold relative to the target muscle MEP. ADM, abductor digiti minimi; APB, abductor pollicis brevis; ECR, extensor carpi radialis; FCR, flexor carpi radialis.

696

697 10.2 Detailed clinical characteristics of participants.

It is made available under a [CC-BY-NC-ND 4.0 International license](https://creativecommons.org/licenses/by-nc-nd/4.0/).

**Supporting Information Table 2. Detailed clinical characteristics of participants.**

**Extended Table 1-2. Detailed clinical characteristics of participants.**

|     | Age, Y <sup>a</sup> /Sex | Approach | mJOA | Racial category  | Ethnic category | Symptom Onset | Unsteady gait | Pain**            | Numb-ness | Weak-ness | Hyporeflexia | Sphincter Dys-function | Severe Foraminal Stenosis*** | T2 Signal Change   |              |
|-----|--------------------------|----------|------|------------------|-----------------|---------------|---------------|-------------------|-----------|-----------|--------------|------------------------|------------------------------|--------------------|--------------|
| P01 | 60-69/M                  | Posteri  | 15   | Unspecified      | Unspecified     | Chronic       | N             | None              | Y         | Y         | U            | U                      | N                            | C5, C6             |              |
| P02 | 50-59/F                  | Posteri  | 13   | White            | Not Hispanic    | Chronic       | N             | AN & Radiating    | N         | Y         | N            | N                      | N                            | None               | C4-C7        |
| P03 | 50-59/M                  | Posteri  | 16   | Unspecified      | Unspecified     | Chronic       | Y             | AN & Radiating    | Y         | Y         | Y            | Y                      | N                            | C6                 | C3-C7        |
| P04 | 50-59/F                  | Posteri  | 9    | Asian            | Not Hispanic    | Chronic       | Y             | AN & Radiating    | Y         | Y         | Y            | Y                      | N                            | None               | C3-C7        |
| P05 | 70-79/M                  | Posteri  | 13   | Unspecified      | Not Hispanic    | Chronic       | Y             | None              | Y         | Y         | N            | N                      | N                            | C7                 | C3-C6        |
| P06 | 50-59/F                  | Posteri  | 16   | White            | Not Hispanic    | Chronic       | Y             | AN                | N         | Y         | Y            | Y                      | N                            | Unknown            | None         |
| P07 | 30-39/M                  | Anterio  | 16   | Unspecified      | Unspecified     | Chronic       | N             | AN                | Y         | N         | Y            | Y                      | N                            | C6                 | C5-C6        |
| P08 | 50-59/M                  | Posteri  | 14   | Unspecified      | Unspecified     | Chronic       | Y             | AN & Radiating    | Y         | Y         | N            | N                      | N                            | C7                 | C3-C5, C6-C7 |
| P09 | 60-69/M                  | Posteri  | 14   | Unspecified      | Unspecified     | Chronic       | Y             | AN                | N         | N         | N            | Y                      | N                            | None               | C5-C6        |
| P10 | 70-79/F                  | Posteri  | 9    | White            | Not Hispanic    | Chronic       | N             | AN                | N         | Y         | Y            | N                      | N                            | C4, C5             | C3-C4        |
| P11 | 40-49/F                  | Anterio  | 16   | White            | Not Hispanic    | Chronic       | N             | AN & Radiating    | N         | Y         | N            | N                      | N                            | C6, C7             | C5-C6        |
| P12 | 60-69/F                  | Anterio  | 12   | Unspecified      | Unspecified     | Chronic       | Y             | Unknown           | U         | U         | U            | N                      | Y                            | None               | C3-C4        |
| P13 | 60-69/M                  | Anterio  | 11   | More than one    | Not Hispanic    | Chronic       | N             | AN & Radiating    | N         | Y         | N            | N                      | N                            | None               | C4-C6        |
| P14 | 50-59/M                  | Anterio  | 15   | White            | Not Hispanic    | Chronic       | Y             | AN & UB           | Y         | Y         | N            | N                      | N                            | C4, C6             | C3-C7        |
| P15 | 40-49/M                  | Posteri  | 7    | Black or African | Not Hispanic    | Chronic       | Y             | AN & UB           | N         | Y         | Y            | Y                      | N                            | C4, C6, C8         | C3-C5        |
| P16 | 60-69/M                  | Posteri  | 18   | White            | Not Hispanic    | Chronic       | N             | AN & Radiating    | N         | Y         | Y            | Y                      | N                            | C4, C5, C7         | C3-T2        |
| P17 | 70-79/M                  | Posteri  | 13   | Unspecified      | Unspecified     | Chronic       | Y             | AN & Radiating    | N         | Y         | Y            | Y                      | N                            | C4, C5, C6, C7, C8 | C3-C4        |
| P18 | 70-79/M                  | Anterio  | 13   | White            | Not Hispanic    | Chronic       | Y             | AN, Radiating, UB | N         | Y         | N            | N                      | N                            | C6, C7             | None         |
| P19 | 60-69/F                  | Both     | 11   | More than one    | Hispanic        | Chronic       | Y             | AN                | N         | N         | N            | N                      | N                            | None               | None         |
| P20 | 70-79/M                  | Posteri  | 9    | White            | Not Hispanic    | Subacute      | Y             | Radiating         | N         | Y         | Y            | N                      | Y                            | C4, C5, C6, C7     | C3-C7        |
| P21 | 80-90/F                  | Posteri  | 11   | White            | Not Hispanic    | Chronic       | Y             | AN & Radiating    | N         | Y         | Y            | N                      | N                            | C4                 | C3-C4        |
| P22 | 60-69/F                  | Anterio  | 15   | White            | Not Hispanic    | Chronic       | Y             | AN                | Y         | Y         | Y            | Y                      | N                            | None               | None         |
| P23 | 50-59/M                  | Posteri  | 15   | Unspecified      | Not Hispanic    | Chronic       | Y             | AN & Radiating    | Y         | Y         | N            | N                      | N                            | C5, C6             | C3-C4, C5-C7 |
| P24 | 80-89/M                  | Posteri  | 18   | Unspecified      | Not Hispanic    | Chronic       | N             | AN                | N         | Y         | Y            | N                      | N                            | C5                 | C3-C5        |
| P25 | 70-79/M                  | Posteri  | 14   | Unspecified      | Unspecified     | Chronic       | Y             | None              | Y         | N         | N            | N                      | N                            | C5, C6             | C3-C6        |
| P26 | 50-59/M                  | Posteri  | 13   | White            | Not Hispanic    | Chronic       | Y             | None              | N         | Y         | Y            | Y                      | N                            | None               | None         |
| P27 | 70-79/F                  | Posteri  | 13   | White            | Not Hispanic    | Chronic       | Y             | Unknown           | Y         | Y         | U            | U                      | N                            | C4, C5, C6, C7     | C3-C4        |
| P28 | 50-59/F                  | Anterio  | 13   | Asian            | Not Hispanic    | Chronic       | N             | Radiating         | N         | Y         | N            | N                      | N                            | C6, C7             | None         |
| P29 | 70-79/F                  | Posteri  | 12   | White            | Not Hispanic    | Chronic       | Y             | None              | N         | Y         | Y            | Y                      | Y                            | None               | C3-C7        |
| P30 | 70-79/M                  | Posteri  | 11   | Unspecified      | Hispanic        | Chronic       | Y             | None              | N         | Y         | Y            | Y                      | N                            | C4, C5, C6         | C3-C4        |
| P31 | 70-79/M                  | Posteri  | 16   | Unspecified      | Unspecified     | Chronic       | Y             | None              | N         | N         | Y            | U                      | N                            | None               | C3-C6        |
| P32 | 40-49/M                  | Posteri  | 15   | Black or African | Not Hispanic    | Subacute      | N             | AN                | Y         | Y         | U            | U                      | N                            | Unknown            | Unknown      |
| P33 | 70-79/F                  | Posteri  | 14   | Black or African | Not Hispanic    | Chronic       | Y             | None              | N         | Y         | N            | Y                      | N                            | C5, C6, C7         | C3-T2        |
| P34 | 50-59/M                  | Posteri  | 18   | White            | Not Hispanic    | Chronic       | N             | Unknown           | N         | U         | U            | U                      | N                            | C5, C7             | C4-C5        |
| P35 | 50-59/F                  | Posteri  | 17   | White            | Not Hispanic    | Chronic       | N             | AN & Radiating    | N         | N         | Y            | Y                      | N                            | C5                 | C3-C7        |
| P36 | 70-79/F                  | Posteri  | 13   | White            | Not Hispanic    | Chronic       | Y             | AN                | N         | Y         | Y            | N                      | N                            | C4, C5, C6, C8     | None         |
| P37 | 60-69/M                  | Posteri  | 15   | Unspecified      | Not Hispanic    | Chronic       | N             | AN & Radiating    | N         | U         | N            | N                      | N                            | C4, C5, C6, C8     | C3-C6        |
| P38 | 60-69/M                  | Posteri  | 13   | White            | Not Hispanic    | Chronic       | N             | Radiating         | N         | Y         | N            | N                      | N                            | None               | None         |
| P39 | 70-79/F                  | Posteri  | 10   | Unspecified      | Hispanic        | Chronic       | Y             | AN & Radiating    | N         | Y         | Y            | Y                      | N                            | C6                 | None         |
| P40 | 50-59/M                  | Posteri  | 17   | White            | Not Hispanic    | Chronic       | Y             | AN & Radiating    | N         | Y         | Y            | Y                      | N                            | C4, C5, C6, C7     | C5-C6        |
| P41 | 40-49/M                  | Posteri  | 17   | Unspecified      | Hispanic        | Chronic       | N             | AN & Radiating    | Y         | Y         | N            | N                      | N                            | C5, C6             | C3-C4        |
| P42 | 70-79/M                  | Posteri  | 12   | White            | Unspecified     | Chronic       | Y             | AN & Radiating    | Y         | Y         | N            | N                      | N                            | C6                 | C5-C7        |
| P43 | 70-79/F                  | Posteri  | 13   | White            | Not Hispanic    | Chronic       | Y             | None              | N         | Y         | Y            | N                      | N                            | None               | C3-C7        |
| P44 | 70-79/M                  | Posteri  | 13   | White            | Not Hispanic    | Chronic       | Y             | AN & Radiating    | N         | Y         | N            | N                      | N                            | C5                 | C3-C6        |
| P45 | 60-69/F                  | Posteri  | 14   | White            | Not Hispanic    | Chronic       | N             | AN & Radiating    | N         | Y         | Y            | Y                      | N                            | C5, C6             | C4-C6        |
| P46 | 50-59/F                  | Posteri  | 17   | Black or African | Not Hispanic    | Chronic       | Y             | AN & Radiating    | N         | Y         | U            | U                      | N                            | C4, C5             | C3-C5        |
| P47 | 70-79/M                  | Posteri  | 7    | Unspecified      | Hispanic        | Chronic       | Y             | Unknown           | N         | Y         | Y            | Y                      | Y                            | C4, C5, C6, C7, C8 | C3-C6        |
| P48 | 50-59/F                  | Posteri  | 18   | Black or African | Not Hispanic    | Chronic       | N             | AN & Radiating    | N         | N         | N            | N                      | N                            | C4                 | C4-C5        |
| P49 | 60-69/F                  | Posteri  | 13   | White            | Not Hispanic    | Chronic       | N             | Radiating         | N         | N         | Y            | N                      | N                            | None               | C5-C6        |
| P50 | 80-89/M                  | Posteri  | 13   | White            | Not Hispanic    | Chronic       | N             | AN                | N         | Y         | Y            | N                      | N                            | C6                 | C3-C5, C6-C7 |
| P51 | 70-79/F                  | Anterio  | 15   | Black or African | Not Hispanic    | Chronic       | Y             | Radiating         | N         | Y         | Y            | Y                      | N                            | C7                 | C3-T2        |
| P52 | 70-79/M                  | Anterio  | 14   | Black or African | Not Hispanic    | Chronic       | Y             | AN & Radiating    | Y         | Y         | Y            | Y                      | N                            | C5                 | C3-C5        |
| P53 | 60-69/F                  | Anterio  | 9    | White            | Not Hispanic    | Chronic       | Y             | None              | N         | Y         | N            | N                      | N                            | C5, C7             | C3-C7        |
| P54 | 40-49/F                  | Posteri  | 14   | Black or African | Not Hispanic    | Chronic       | N             | Radiating         | N         | Y         | N            | N                      | N                            | None               | C7-T1        |
| P55 | 70-79/M                  | Posteri  | 16   | White            | Not Hispanic    | Chronic       | Y             | None              | Y         | Y         | N            | N                      | N                            | C4, C5, C6, C7     | None         |
| P56 | 60-69/F                  | Posteri  | 18   | White            | Not Hispanic    | Chronic       | N             | AN                | N         | N         | N            | N                      | N                            | None               | None         |
| P57 | 60-69/F                  | Posteri  | 13   | White            | Unspecified     | Chronic       | Y             | AN & Radiating    | Y         | Y         | Y            | Y                      | N                            | Unknown            | Unknown      |
| P58 | 80-89/M                  | Posteri  | 16   | White            | Not Hispanic    | Chronic       | Y             | None              | N         | N         | Y            | Y                      | N                            | C4, C5             | None         |
| P59 | 70-79/F                  | Anterio  | 10   | White            | Not Hispanic    | Chronic       | Y             | None              | Y         | Y         | N            | N                      | Y                            | C4, C7             | None         |

All assessments were performed blinded to the electrophysiology results. \*At the time of surgery. \*\*Upper back - UB, Axial neck - AN. \*\*\*On the stimulated side. Severe foraminal stenosis is defined as no visible fat around the nerve root within the foramen. Severe foraminal stenosis and T2 signal change were assessed between C4 and T1 segments. mJOA, modified Japanese Orthopaedic Association (mJOA) score. No - N, Yes - Y, Unknown - U.

698 10.3 Convergence of posterior subthreshold spinal stimulation and suprathreshold brain stimulation in individual  
699 participants

It is made available under a [CC-BY-NC-ND 4.0 International license](https://creativecommons.org/licenses/by-nc-nd/4.0/).

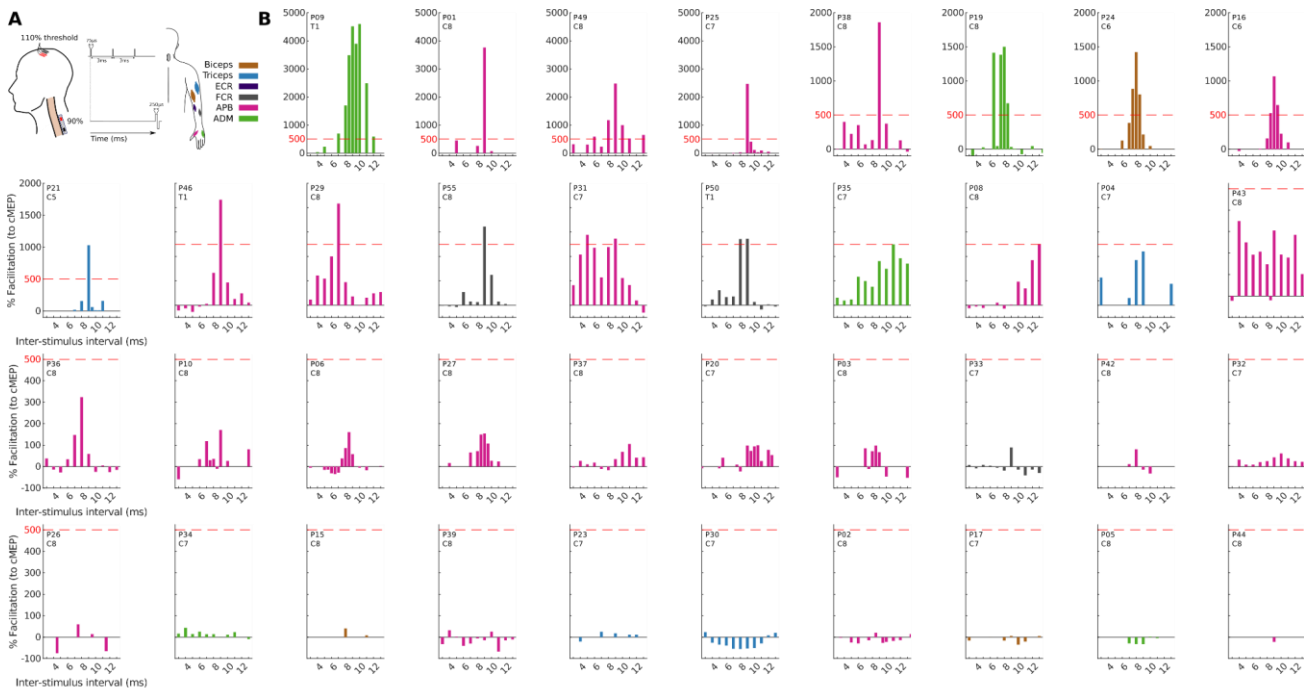

**Supporting Information Figure 1. Posterior subthreshold spinal stimulation converges with suprathreshold brain stimulation in individual participants.** **A**, Schematic diagram representing the triple-pulse sequence delivered to the brain and the single pulse delivered to the spinal cord. The catheter electrode was positioned at different segments in different participants targeting the dorsal root entry zone (DREZ) of the spinal cord. **B**, When the catheter is placed on the dorsal aspect of the dura targeting the DREZ ( $n = 38$ , 23M/15F), a strong facilitation is visible in the majority of participants in the range 8-10ms. In a subset of participants, facilitation appears absent. The facilitation is calculated relative to the brain-only motor evoked potential (MEP) size, with a 0% facilitation indicating that the MEP observed in the paired condition is the same size as the MEP in the brain-only condition. Bar chart ordering is sorted by maximum facilitation and color indicates the plotted targeted muscle (legend shown in A). P36 is duplicated from Fig. 2. ADM, abductor digiti minimi; APB, abductor pollicis brevis; ECR, extensor carpi radialis; FCR, flexor carpi radialis.

701 10.4 Convergence of anterior subthreshold spinal stimulation and suprathreshold brain stimulation in individual  
702 participants

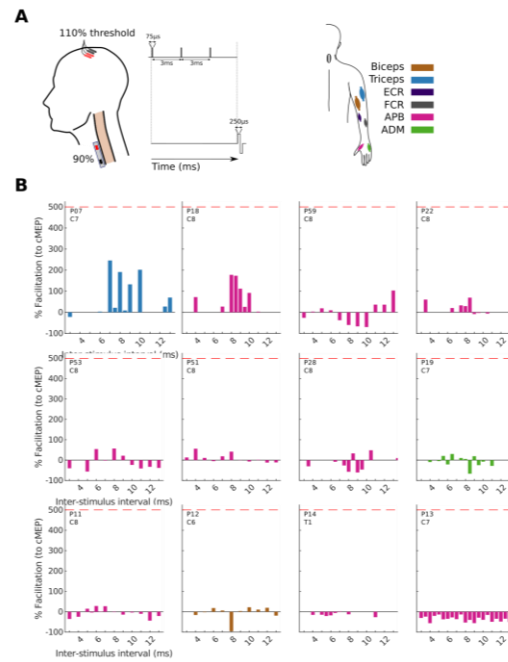

**Supporting Information Figure 2. Anterior subthreshold spinal stimulation converges with suprathreshold brain stimulation in individual participants.** **A**, Schematic diagram representing the triple-pulse sequence delivered to the brain and the single pulse delivered to the spinal cord. The catheter electrode was positioned at different segments in different participants targeting the ventral root exit zone of the spinal cord. **B**, When the catheter is placed on the anterior aspect of the dura (n = 12, 4M/8F), facilitation is not present in the majority of participants. The facilitation is calculated relative to the brain-only motor evoked potential (MEP) size, with a 0% facilitation indicating that the MEP observed in the paired condition is the same size as the MEP in the brain-only condition. Bar chart ordering is sorted by maximum facilitation and color indicates the plotted targeted muscle (legend shown in A). ADM, abductor digiti minimi; APB, abductor pollicis brevis; ECR, extensor carpi radialis; FCR, flexor carpi radialis.

703
